# Supplementary material for: Transcriptional fingerprints of antigen-presenting cell subsets in the human vaginal mucosa and skin reflect tissue-specific immune microenvironments
Source: PubMed Central journal article supplement (PMC4268898; doi:10.1186/s13073-014-0098-y), 2014-11-25
Supplement: 13073_2014_98_MOESM1_ESM.pdf [file 13073_2014_98_MOESM1_ESM.pdf]

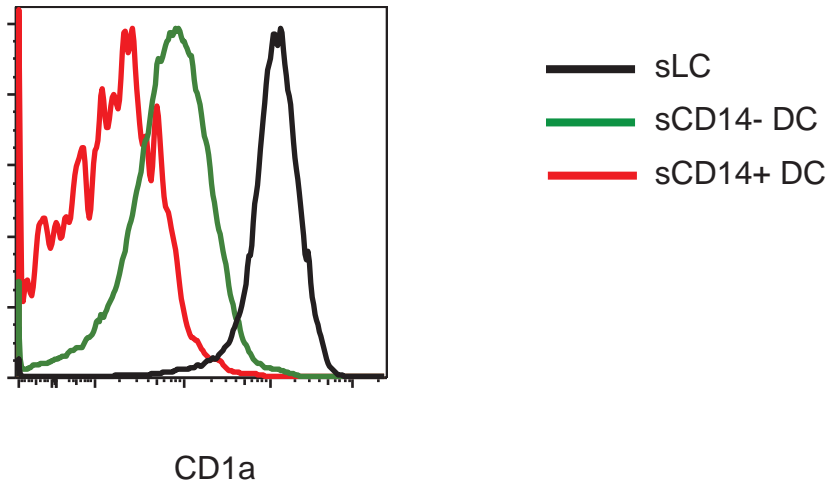

**Figure S16: CD1a expression on skin DCs.**

CD1a expression was analyzed by flow cytometry on skin LCs (black line), sCD14- DCs (green line) and sCD14+ DCs (red line).
