# Supplementary material for: Transcriptional fingerprints of antigen-presenting cell subsets in the human vaginal mucosa and skin reflect tissue-specific immune microenvironments
Source: PubMed Central journal article supplement (PMC4268898; doi:10.1186/s13073-014-0098-y), 2014-11-25
Supplement: 13073_2014_98_MOESM2_ESM.pdf [file 13073_2014_98_MOESM2_ESM.pdf]

Before CombatR Correction

After CombatR Correction

a

**Principal Variance Component Analysis (PVCA)**

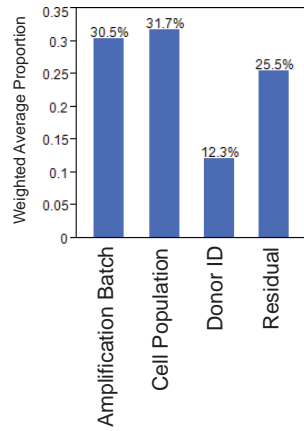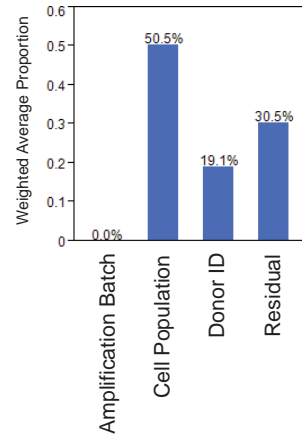

b

**Amplification Batch**

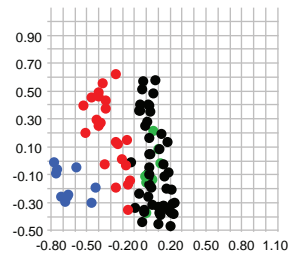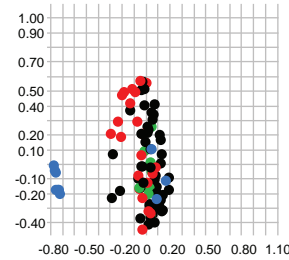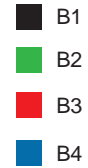

**Tissue**

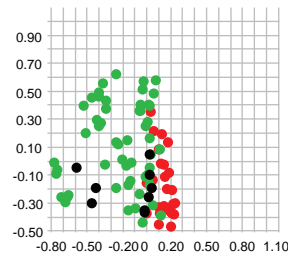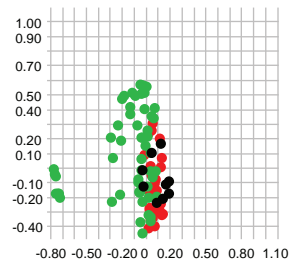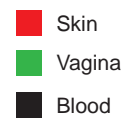

**Cell Population**

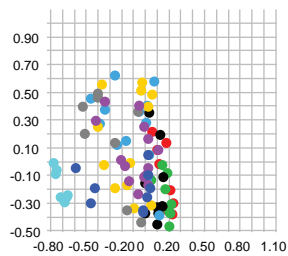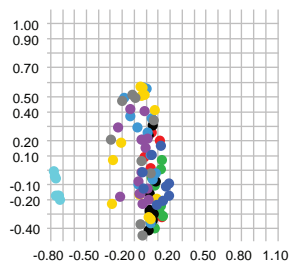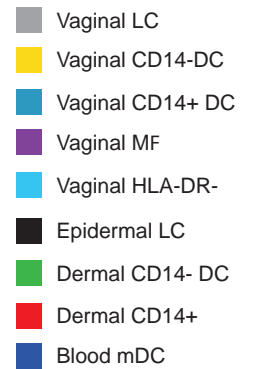

**Figure S17 - Batch correction analysis.** a. Principal variance component analysis (PVCA) before and after batch correction. b. Principal component analysis (PCA) before and after batch correction. Samples are colored by amplification batch, tissue or cell population.
