# Supplementary material for: Transcriptional fingerprints of antigen-presenting cell subsets in the human vaginal mucosa and skin reflect tissue-specific immune microenvironments
Source: PubMed Central journal article supplement (PMC4268898; doi:10.1186/s13073-014-0098-y), 2014-11-25
Supplement: 13073_2014_98_MOESM5_ESM.pdf [file 13073_2014_98_MOESM5_ESM.pdf]

| Specificity | Illumina ID  | Symbol       | Definition                                                                                | Skin |           |           | Vagina |           |           | Blood |      |
|-------------|--------------|--------------|-------------------------------------------------------------------------------------------|------|-----------|-----------|--------|-----------|-----------|-------|------|
|             |              |              |                                                                                           | sLC  | sCD14- DC | sCD14+ DC | vLC    | vCD14- DC | vCD14+ DC | vMF   | mDC  |
| sLC         | ILMN 1748546 | 2-Sep        | Homo sapiens septin 2 (SEPT2), transcript variant 1                                       | 1.70 | 0.92      | 0.83      | 0.95   | 0.75      | 0.79      | 1.13  | 1.63 |
| sLC         | ILMN 2371379 | ACLY         | Homo sapiens ATP citrate lyase (ACLY), transcript variant 2                               | 2.21 | 0.87      | 0.72      | 0.93   | 0.72      | 0.93      | 0.95  | 0.98 |
| sLC         | ILMN 1749014 | ACLY         | Homo sapiens ATP citrate lyase (ACLY), transcript variant 1                               | 2.20 | 0.83      | 0.67      | 0.90   | 0.78      | 0.69      | 0.85  | 1.27 |
| sLC         | ILMN 2328280 | ACTL6A       | Homo sapiens actin-like 6A (ACTL6A), transcript variant 1                                 | 2.16 | 1.31      | 1.11      | 0.90   | 1.26      | 0.90      | 1.33  | 0.96 |
| sLC         | ILMN 1654010 | AGPAT3       | Homo sapiens 1-acylglycerol-3-phosphate O-acyltransferase 3 (AGPAT3)                      | 1.56 | 0.98      | 1.00      | 1.16   | 1.14      | 1.09      | 1.06  | 1.07 |
| sLC         | ILMN 1712786 | AHCYL2       | Homo sapiens S-adenosylhomocysteine hydrolase-like 2 (AHCYL2)                             | 3.75 | 1.26      | 1.26      | 1.12   | 1.30      | 1.01      | 1.12  | 1.33 |
| sLC         | ILMN 2181867 | ANKRD20B     | Homo sapiens ankyrin repeat domain 20B (ANKRD20B) on chromosome 10                        | 1.57 | 0.98      | 1.09      | 0.96   | 0.93      | 0.97      | 1.20  | 0.84 |
| sLC         | ILMN 1694548 | ANXA3        | Homo sapiens annexin A3 (ANXA3)                                                           | 9.31 | 0.64      | 1.03      | 1.70   | 1.67      | 1.03      | 1.06  | 0.49 |
| sLC         | ILMN 1667086 | AP3M1        | Homo sapiens adaptor-related protein complex 3, mu 1 subunit (AP3M1)                      | 1.90 | 0.82      | 0.62      | 0.92   | 1.11      | 0.78      | 1.34  | 0.88 |
| sLC         | ILMN 1763730 | APPL1        | Homo sapiens adaptor protein, phosphotyrosine interaction, PH domain containing 1 (APPL1) | 1.71 | 1.43      | 1.15      | 1.02   | 1.02      | 1.06      | 0.94  | 1.42 |
| sLC         | ILMN 1810712 | ARRGEF12     | Homo sapiens Rho guanine nucleotide exchange factor (GEF) 12 (ARRGEF12)                   | 1.75 | 1.19      | 1.14      | 1.07   | 1.37      | 0.89      | 1.10  | 0.59 |
| sLC         | ILMN 1715181 | ARRDC2       | Homo sapiens arrestin domain containing 2 (ARRDC2), transcript variant 1                  | 1.93 | 1.26      | 0.93      | 0.86   | 0.90      | 0.89      | 0.95  | 0.72 |
| sLC         | ILMN 1684042 | BET1         | Homo sapiens blocked early in transport 1 homolog (S. cerevisiae) (BET1)                  | 2.53 | 0.93      | 1.10      | 1.00   | 1.02      | 1.00      | 1.00  | 0.82 |
| sLC         | ILMN 1687743 | BTBD7        | Homo sapiens BTB (POZ) domain containing 7 (BTBD7), transcript variant 1                  | 1.62 | 1.21      | 1.16      | 0.74   | 0.57      | 0.60      | 0.74  | 0.47 |
| sLC         | ILMN 2221076 | C17ORF85     | Homo sapiens chromosome 17 open reading frame 85 (C17orf85)                               | 1.59 | 0.78      | 0.68      | 1.01   | 0.98      | 0.79      | 0.80  | 0.98 |
| sLC         | ILMN 3253728 | C19ORF64     | PREDICTED: Homo sapiens chromosome 19 open reading frame 64 (C19orf64)                    | 5.58 | 1.14      | 1.35      | 1.21   | 1.26      | 1.25      | 0.94  | 0.90 |
| sLC         | ILMN 1657683 | C1ORF198     | Homo sapiens chromosome 1 open reading frame 198 (C1orf198)                               | 1.98 | 1.15      | 1.06      | 1.23   | 1.21      | 1.14      | 1.09  | 0.98 |
| sLC         | ILMN 2193175 | C3ORF1       | Homo sapiens chromosome 3 open reading frame 1 (C3orf1)                                   | 1.93 | 1.11      | 1.26      | 1.13   | 1.10      | 1.12      | 1.12  | 0.68 |
| sLC         | ILMN 1657064 | C6ORF70      | Homo sapiens chromosome 6 open reading frame 70 (C6orf70)                                 | 1.54 | 0.95      | 0.90      | 1.00   | 0.89      | 0.71      | 0.84  | 0.73 |
| sLC         | ILMN 1711799 | C9ORF40      | Homo sapiens chromosome 9 open reading frame 40 (C9orf40)                                 | 1.56 | 1.34      | 1.09      | 0.97   | 0.94      | 0.98      | 0.97  | 0.75 |
| sLC         | ILMN 1792660 | CAMSAP1L1    | Homo sapiens calmodulin regulated spectrin-associated protein 1-like 1 (CAMSAP1L1)        | 1.59 | 1.33      | 1.04      | 0.95   | 0.78      | 0.96      | 1.31  | 0.41 |
| sLC         | ILMN 2053921 | CAPZB        | Homo sapiens capping protein (actin filament) muscle Z-line, beta (CAPZB)                 | 1.63 | 0.80      | 0.89      | 1.14   | 1.00      | 1.03      | 1.11  | 0.98 |
| sLC         | ILMN 2151739 | CAT          | Homo sapiens catalase (CAT)                                                               | 1.74 | 1.40      | 1.21      | 0.62   | 1.18      | 0.67      | 0.89  | 1.11 |
| sLC         | ILMN 1804735 | CBS          | Homo sapiens cystathionine-beta-synthase (CBS)                                            | 2.41 | 0.99      | 0.97      | 1.10   | 1.01      | 1.11      | 1.00  | 0.97 |
| sLC         | ILMN 1716342 | CCDC132      | Homo sapiens coiled-coil domain containing 132 (CCDC132), transcript variant 1            | 2.12 | 1.00      | 0.97      | 0.99   | 1.12      | 1.00      | 1.27  | 1.18 |
| sLC         | ILMN 1731107 | CCDC92       | Homo sapiens coiled-coil domain containing 92 (CCDC92)                                    | 2.28 | 0.88      | 0.79      | 0.79   | 0.75      | 0.90      | 1.24  | 0.53 |
| sLC         | ILMN 1703718 | CCT7         | Homo sapiens chaparrin containing TCP1, subunit 7 (eta) (CCT7), transcript variant 1      | 2.19 | 0.80      | 1.03      | 1.17   | 0.93      | 0.84      | 1.23  | 0.77 |
| sLC         | ILMN 1683450 | CDC45A       | Homo sapiens cell division cycle associated 5 (CDC45A)                                    | 3.12 | 0.94      | 1.00      | 1.48   | 1.27      | 1.19      | 0.79  | 0.73 |
| sLC         | ILMN 1735199 | CIAPIN1      | Homo sapiens cytokine induced apoptosis inhibitor 1 (CIAPIN1)                             | 1.56 | 1.01      | 1.03      | 1.00   | 1.17      | 1.03      | 1.26  | 1.37 |
| sLC         | ILMN 1741594 | CLCN6        | Homo sapiens chloride channel 6 (CLCN6), transcript variant CLCN6d                        | 1.74 | 1.12      | 0.61      | 1.01   | 0.84      | 0.81      | 0.84  | 1.09 |
| sLC         | ILMN 1762718 | CMTM4        | Homo sapiens CKLF-like MARVEL transmembrane domain containing 4 (CMTM4)                   | 1.62 | 1.24      | 1.26      | 1.07   | 1.12      | 1.12      | 1.10  | 0.89 |
| sLC         | ILMN 1696494 | CMTM6        | Homo sapiens CKLF-like MARVEL transmembrane domain containing 6 (CMTM6)                   | 2.47 | 1.15      | 0.96      | 0.73   | 0.69      | 0.53      | 0.66  | 1.76 |
| sLC         | ILMN 2078334 | CNOT10       | Homo sapiens CCR4-NOT transcription complex, subunit 10 (CNOT10)                          | 2.00 | 1.02      | 0.96      | 0.86   | 1.17      | 0.96      | 0.78  | 0.80 |
| sLC         | ILMN 3240389 | CPOX         | Homo sapiens coproporphyrinogen oxidase (CPOX)                                            | 2.10 | 1.44      | 1.06      | 1.24   | 1.35      | 0.90      | 0.98  | 0.82 |
| sLC         | ILMN 1791593 | DENND5B      | Homo sapiens DENN/MADD domain containing 5B (DENND5B)                                     | 1.92 | 1.08      | 1.13      | 1.24   | 1.22      | 1.09      | 1.13  | 0.98 |
| sLC         | ILMN 2405642 | DHDDS        | Homo sapiens dehydrodichilyl diphosphate synthase (DHDDS), transcript variant 1           | 1.98 | 0.92      | 0.82      | 1.11   | 1.11      | 0.97      | 1.04  | 0.84 |
| sLC         | ILMN 1655614 | DSP          | Homo sapiens desmoplakin (DSP), transcript variant 2                                      | 2.33 | 1.06      | 1.12      | 2.13   | 2.25      | 1.32      | 1.94  | 1.00 |
| sLC         | ILMN 1773847 | DYNC112      | Homo sapiens dynein, cytoplasmic 1, intermediate chain 2 (DYNC112)                        | 2.46 | 0.93      | 0.77      | 0.95   | 0.80      | 0.86      | 1.05  | 0.49 |
| sLC         | ILMN 1784320 | ELMO1        | Homo sapiens engulfment and cell motility 1 (ELMO1), transcript variant 1                 | 2.34 | 1.39      | 1.39      | 1.07   | 1.00      | 0.84      | 0.76  | 1.22 |
| sLC         | ILMN 1783695 | EPRS         | Homo sapiens glutamyl-prolyl-RNA synthetase (EPRS)                                        | 2.24 | 0.64      | 0.73      | 0.97   | 0.98      | 0.89      | 1.19  | 1.62 |
| sLC         | ILMN 1671844 | EYAA4        | Homo sapiens eyes absent homolog 4 (Drosophila) (EYAA4), transcript variant 1             | 1.52 | 1.11      | 1.00      | 1.01   | 1.01      | 1.01      | 1.04  | 0.97 |
| sLC         | ILMN 1790249 | F8A1         | Homo sapiens coagulation factor VIII-associated (intronic transcript) 1 (F8A1)            | 2.20 | 0.70      | 0.82      | 0.75   | 0.83      | 1.06      | 0.97  | 0.92 |
| sLC         | ILMN 1747119 | FBXO46       | PREDICTED: Homo sapiens F-box protein 46, transcript variant 5 (FBXO46)                   | 1.63 | 0.97      | 0.87      | 1.13   | 1.14      | 0.84      | 0.87  | 0.88 |
| sLC         | ILMN 1775753 | FBXW2        | Homo sapiens F-box and WD-40 domain protein 2 (FBXW2)                                     | 1.58 | 0.86      | 0.73      | 0.97   | 0.90      | 0.93      | 1.08  | 1.09 |
| sLC         | ILMN 3271630 | FGGY         | Homo sapiens FGGY carbohydrate kinase domain containing (FGGY)                            | 4.45 | 1.08      | 0.89      | 1.14   | 1.22      | 1.07      | 1.18  | 1.04 |
| sLC         | ILMN 1737604 | FLJ10986     | Homo sapiens hypothetical protein FLJ10986 (FLJ10986)                                     | 5.12 | 0.75      | 0.89      | 0.87   | 0.95      | 0.88      | 1.12  | 0.66 |
| sLC         | ILMN 1680390 | GCNT2        | Homo sapiens glucosaminyl (N-acetyl) transferase 2, 1-branching enzyme (GCNT2)            | 3.20 | 0.82      | 0.82      | 1.17   | 0.98      | 0.91      | 0.96  | 1.20 |
| sLC         | ILMN 1660698 | GTPBP8       | Homo sapiens GTP-binding protein 8 (putative) (GTPBP8), transcript variant 1              | 1.63 | 1.18      | 1.23      | 0.92   | 1.05      | 0.89      | 0.93  | 0.96 |
| sLC         | ILMN 1715113 | HARS2        | Homo sapiens histidyl-tRNA synthetase 2, mitochondrial (putative) (HARS2)                 | 1.63 | 1.18      | 1.21      | 0.87   | 0.74      | 0.75      | 0.93  | 0.90 |
| sLC         | ILMN 1657395 | HMGCR        | Homo sapiens 3-hydroxy-3-methylglutaryl-Coenzyme A reductase (HMGCR)                      | 2.04 | 0.99      | 0.92      | 1.05   | 1.18      | 0.88      | 0.82  | 0.79 |
| sLC         | ILMN 2384591 | HNI1         | Homo sapiens hematological and neurological expressed 1 (HNI1), transcript variant 1      | 2.68 | 1.09      | 1.13      | 1.05   | 1.47      | 1.02      | 0.98  | 0.96 |
| sLC         | ILMN 1827211 | HS.550193    | Human unidentified mRNA, partial sequence                                                 | 1.77 | 0.98      | 1.22      | 1.00   | 1.09      | 1.01      | 1.07  | 1.16 |
| sLC         | ILMN 1894388 | HS.552082    | UI-H-FHI-bfi-p-18-0-UI.s1 NCI CGAP FHI Homo sapiens cDNA clone:hs552082                   | 1.55 | 0.99      | 0.92      | 1.12   | 1.42      | 1.09      | 1.19  | 0.99 |
| sLC         | ILMN 1849013 | HS.570988    | Homo sapiens primary neuroblastoma cDNA, clone:Nbla10111, full insert                     | 2.44 | 1.31      | 0.78      | 0.68   | 0.82      | 0.83      | 0.93  | 0.56 |
| sLC         | ILMN 1833858 | HS.66187     | Homo sapiens clone 23700 mRNA sequence                                                    | 3.11 | 0.96      | 1.01      | 1.57   | 1.37      | 1.16      | 1.08  | 0.88 |
| sLC         | ILMN 2217329 | IAH1         | Homo sapiens isoamyl acetate-hydrolyzing esterase 1 homolog (S. cerevisiae) (IAH1)        | 2.30 | 1.03      | 0.69      | 0.94   | 1.00      | 0.82      | 0.80  | 1.03 |
| sLC         | ILMN 1759084 | INTS8        | Homo sapiens integrator complex subunit 8 (INTS8)                                         | 1.61 | 1.13      | 1.52      | 0.86   | 1.02      | 0.92      | 1.26  | 0.94 |
| sLC         | ILMN 1684746 | IPO11        | Homo sapiens importin 11 (IPO11)                                                          | 2.36 | 0.96      | 0.86      | 1.10   | 1.07      | 1.02      | 1.26  | 0.80 |
| sLC         | ILMN 2150187 | KCTD18       | Homo sapiens potassium channel tetramerisation domain containing 18 (KCTD18)              | 1.73 | 1.12      | 1.80      | 0.92   | 0.87      | 0.93      | 1.36  | 1.37 |
| sLC         | ILMN 2410771 | KEAP1        | Homo sapiens kelch-like ECH-associated protein 1 (KEAP1), transcript variant 1            | 1.53 | 0.93      | 1.00      | 0.82   | 1.11      | 0.94      | 0.77  | 0.33 |
| sLC         | ILMN 1796749 | KIF1C        | Homo sapiens kinesin family member 1C (KIF1C)                                             | 2.09 | 0.89      | 0.89      | 1.12   | 1.12      | 1.06      | 1.21  | 0.84 |
| sLC         | ILMN 1727134 | KLHDC5       | Homo sapiens kelch domain containing 5 (KLHDC5)                                           | 2.48 | 1.00      | 0.91      | 1.11   | 1.13      | 1.05      | 1.06  | 0.90 |
| sLC         | ILMN 3256004 | LOC100130003 | PREDICTED: Homo sapiens misc RNA (LOC100130003), miscRNA                                  | 1.61 | 1.05      | 1.28      | 0.95   | 0.73      | 0.84      | 0.86  | 0.70 |
| sLC         | ILMN 3279219 | LOC100132457 | PREDICTED: Homo sapiens similar to Sm protein G (LOC100132457)                            | 1.72 | 1.07      | 1.34      | 0.91   | 0.79      | 0.76      | 0.86  | 0.71 |
| sLC         | ILMN 2205211 | LOC134997    | Homo sapiens peptidylprolyl isomerase A processed pseudogene (LOC134997)                  | 1.59 | 0.84      | 0.69      | 1.10   | 1.18      | 0.85      | 0.88  | 1.22 |
| sLC         | ILMN 1667298 | LOC201229    | PREDICTED: Homo sapiens hypothetical protein LOC201229, transcript variant 1              | 1.93 | 1.11      | 0.96      | 1.12   | 1.21      | 1.14      | 1.04  | 1.00 |
| sLC         | ILMN 1734880 | LOC644128    | PREDICTED: Homo sapiens hypothetical protein LOC644128 (LOC644128)                        | 1.91 | 0.99      | 0.76      | 1.09   | 0.88      | 0.84      | 1.10  | 0.81 |
| sLC         | ILMN 1715525 | LOC646038    | PREDICTED: Homo sapiens similar to ADP-ribosylation factor 7 (LOC646038)                  | 3.10 | 1.04      | 0.99      | 1.14   | 1.22      | 1.05      | 0.96  | 1.00 |
| sLC         | ILMN 3245074 | LOC646916    | PREDICTED: Homo sapiens hypothetical LOC646916 (LOC646916)                                | 1.70 | 1.22      | 1.20      | 0.76   | 0.92      | 0.86      | 0.89  | 1.04 |
| sLC         | ILMN 1694752 | LOC727726    | PREDICTED: Homo sapiens similar to poly (ADP-ribose) glycohydrolase 1 (LOC727726)         | 1.98 | 1.04      | 1.19      | 1.13   | 1.07      | 1.09      | 1.15  | 1.04 |
| sLC         | ILMN 1691949 | LOC728554    | PREDICTED: Homo sapiens similar to THO complex 3 (LOC728554)                              | 1.80 | 0.43      | 0.69      | 0.91   | 0.62      | 0.69      | 1.01  | 0.31 |
| sLC         | ILMN 3304898 | LOC927555    | PREDICTED: Homo sapiens misc RNA (LOC927555), miscRNA                                     | 1.53 | 1.21      | 1.15      | 0.92   | 1.14      | 1.03      | 1.01  | 0.83 |
| sLC         | ILMN 1691131 | LSMD1        | Homo sapiens LSM domain containing 1 (LSMD1)                                              | 1.75 | 1.01      | 1.17      | 1.02   | 1.13      | 1.10      | 0.98  | 1.14 |
| sLC         | ILMN 1665219 | LTBP4        | Homo sapiens latent transforming growth factor beta binding protein 4 (LTBP4)             | 1.99 | 0.89      | 0.86      | 1.25   | 1.29      | 1.36      | 1.08  | 0.93 |
| sLC         | ILMN 2388272 | MED24        | Homo sapiens mediator complex subunit 24 (MED24), transcript variant 1                    | 2.26 | 0.69      | 0.84      | 1.07   | 0.73      | 0.95      | 1.09  | 0.99 |
| sLC         | ILMN 1749821 | MED28        | Homo sapiens mediator complex subunit 28 (MED28)                                          | 1.97 | 1.06      | 1.24      | 0.64   | 0.59      | 0.66      | 0.62  | 1.14 |
| sLC         | ILMN 1731184 | MELK         | Homo sapiens maternal embryonic leucine zipper kinase (MELK)                              | 3.19 | 1.23      | 1.19      | 1.13   | 1.23      | 1.09      | 1.12  | 0.91 |
| sLC         | ILMN 1740512 | MGC39900     | PREDICTED: Homo sapiens hypothetical protein MGC39900 (MGC39900)                          | 2.00 | 0.99      | 0.98      | 1.11   | 1.14      | 1.05      | 1.00  | 1.10 |
| sLC         | ILMN 1690807 | MKL2         | Homo sapiens MKL/myocardin-like 2 (MKL2)                                                  | 1.54 | 1.00      | 0.99      | 1.00   | 1.04      | 1.00      | 1.03  | 1.00 |
| sLC         | ILMN 3237324 | MMS19        | Homo sapiens MMS19 nucleotide excision repair homolog (S. cerevisiae) (MMS19)             | 1.69 | 1.07      | 0.90      | 0.85   | 1.04      | 0.98      | 0.78  | 0.59 |
| sLC         | ILMN 2125562 | MOBK1B       | Homo sapiens MOB1, Mps One Binder kinase activator-like 1B (yeast) (MOBK1B)               | 1.55 | 0.85      | 0.78      | 1.07   | 0.99      | 1.04      | 1.03  | 0.65 |
| sLC         | ILMN 3242011 | MOBK1B       | Homo sapiens MOB1, Mps One Binder kinase activator-like 1B (yeast) (MOBK1B)               | 2.03 | 0.89      | 1.01      | 1.10   | 0.99      | 0.84      | 1.07  | 0.52 |
| sLC         | ILMN 2121282 | MRPS18B      | Homo sapiens mitochondrial ribosomal protein S18B (MRPS18B), nuclear encoded              | 1.76 | 0.86      | 0.87      | 1.01   | 0.97      | 0.90      | 0.92  | 0.72 |
| sLC         | ILMN 1687359 | MRPS23       | Homo sapiens mitochondrial ribosomal protein S23 (MRPS23), nuclear encoded                | 1.68 |           |           |        |           |           |       |      |

|          |      |          |          |                                                                                         |      |      |      |      |      |      |      |      |
|----------|------|----------|----------|-----------------------------------------------------------------------------------------|------|------|------|------|------|------|------|------|
| sLC      | ILMN | 1724811  | PARN     | Homo sapiens poly(A)-specific ribonuclease (deadenylation nuclease)                     | 2.45 | 0.52 | 1.17 | 0.71 | 0.65 | 0.77 | 1.23 | 0.45 |
| sLC      | ILMN | 1686871  | PARP1    | Homo sapiens poly (ADP-ribose) polymerase family, member 1 (PARP1)                      | 1.82 | 0.64 | 0.60 | 0.82 | 0.87 | 0.77 | 1.05 | 0.53 |
| sLC      | ILMN | 1678546  | PEX11B   | Homo sapiens peroxisomal biogenesis factor 11 beta (PEX11B)                             | 2.60 | 0.90 | 0.53 | 0.88 | 0.71 | 0.79 | 1.23 | 1.09 |
| sLC      | ILMN | 1763634  | PEX14    | Homo sapiens peroxisomal biogenesis factor 14 (PEX14)                                   | 1.72 | 1.01 | 1.02 | 1.08 | 1.11 | 1.07 | 1.09 | 0.94 |
| sLC      | ILMN | 1728074  | PHAX     | Homo sapiens phosphorylated adaptor for RNA export (PHAX)                               | 1.73 | 1.06 | 0.72 | 0.84 | 0.71 | 0.90 | 0.85 | 0.58 |
| sLC      | ILMN | 1777644  | PIB5PA   | Homo sapiens phosphatidylinositol (4,5) bisphosphate 5-phosphatase, alpha               | 3.35 | 1.16 | 1.12 | 1.19 | 1.31 | 0.90 | 0.88 | 0.96 |
| sLC      | ILMN | 1687896  | PIK3C3   | Homo sapiens phosphoinositide-3-kinase, class 3 (PIK3C3)                                | 1.74 | 1.25 | 1.01 | 0.92 | 0.85 | 0.81 | 1.10 | 0.82 |
| sLC      | ILMN | 2383383  | PIR      | Homo sapiens piron (iron-binding nuclear protein) (PIR), transcript variant 1           | 1.58 | 1.00 | 0.98 | 1.05 | 0.99 | 1.11 | 1.03 | 1.00 |
| sLC      | ILMN | 1719972  | PLXNA3   | Homo sapiens plexin A3 (PLXNA3)                                                         | 1.68 | 0.94 | 0.94 | 1.12 | 0.79 | 1.02 | 1.13 | 0.47 |
| sLC      | ILMN | 1740291  | POLQ     | Homo sapiens polymerase (DNA directed), theta (POLQ)                                    | 1.83 | 0.95 | 1.00 | 1.13 | 1.29 | 1.12 | 1.17 | 1.04 |
| sLC      | ILMN | 1768273  | POP1     | Homo sapiens processing of precursor 1, ribonuclease P/MRP subunit (POP1)               | 1.51 | 1.00 | 1.03 | 1.18 | 1.22 | 1.22 | 1.12 | 1.00 |
| sLC      | ILMN | 1802669  | PPP3CB   | Homo sapiens protein phosphatase 3 (formerly 2B), catalytic subunit, beta               | 1.65 | 0.99 | 0.92 | 0.85 | 0.88 | 0.77 | 1.06 | 0.91 |
| sLC      | ILMN | 1751887  | PREP     | Homo sapiens prolyl endopeptidase (PREP)                                                | 2.21 | 0.93 | 0.80 | 0.88 | 1.20 | 0.84 | 0.85 | 0.61 |
| sLC      | ILMN | 1786021  | PRKAB2   | Homo sapiens protein kinase, AMP-activated beta 2 non-catalytic subunit                 | 2.84 | 1.11 | 0.78 | 1.17 | 1.21 | 0.74 | 0.90 | 1.18 |
| sLC      | ILMN | 2058512  | PSMA2    | Homo sapiens proteasome (prosome, macropain) subunit, alpha type, 2                     | 1.94 | 0.93 | 0.96 | 0.90 | 0.75 | 0.87 | 0.87 | 1.01 |
| sLC      | ILMN | 1776173  | PSMD7    | Homo sapiens proteasome (prosome, macropain) 26S subunit, non-ATPase                    | 1.58 | 0.85 | 0.85 | 0.85 | 0.69 | 0.71 | 1.07 | 1.12 |
| sLC      | ILMN | 1763842  | PTRH1    | Homo sapiens peptidyl-tRNA hydrolase 1 homolog (S. cerevisiae) (PTRH1)                  | 1.64 | 0.96 | 0.89 | 1.21 | 1.22 | 1.09 | 1.02 | 0.99 |
| sLC      | ILMN | 1743049  | PWP1     | Homo sapiens PWP1 homolog (S. cerevisiae) (PWP1)                                        | 2.11 | 1.13 | 0.82 | 0.88 | 0.58 | 0.66 | 0.76 | 1.24 |
| sLC      | ILMN | 1783846  | RAPH1    | Homo sapiens Ras association (RaGDS/AF-6) and pleckstrin homolog                        | 2.44 | 1.09 | 0.88 | 1.20 | 1.25 | 0.90 | 1.00 | 0.54 |
| sLC      | ILMN | 1714461  | RNF14    | Homo sapiens ring finger protein 14 (RNF14), transcript variant 3                       | 2.21 | 1.06 | 1.02 | 1.14 | 1.19 | 1.19 | 1.26 | 0.89 |
| sLC      | ILMN | 1699476  | RPE      | Homo sapiens ribulose-5-phosphate-3-epimerase (RPE), transcript variant 1               | 2.20 | 1.20 | 1.01 | 1.10 | 1.01 | 1.05 | 1.15 | 1.09 |
| sLC      | ILMN | 1730082  | RPSUD4   | Homo sapiens RNA pseudouridylylate synthase domain containing 4 (RPSUD4)                | 1.67 | 0.76 | 0.71 | 1.09 | 0.83 | 0.92 | 0.78 | 1.26 |
| sLC      | ILMN | 2059294  | RTCD1    | Homo sapiens RNA terminal phosphate cyclase domain 1 (RTCD1)                            | 2.13 | 1.04 | 1.14 | 0.90 | 1.02 | 1.04 | 1.04 | 0.86 |
| sLC      | ILMN | 2352036  | RTN4     | Homo sapiens reticulon 4 (RTN4), transcript variant 1                                   | 1.78 | 0.99 | 1.30 | 0.63 | 0.64 | 0.59 | 1.02 | 0.66 |
| sLC      | ILMN | 1743747  | RUSC1    | Homo sapiens RUN and SH3 domain containing 1 (RUSC1)                                    | 1.89 | 0.80 | 0.92 | 1.23 | 1.03 | 0.92 | 1.04 | 0.65 |
| sLC      | ILMN | 2413779  | SEZ6L2   | Homo sapiens seizure related 6 homolog (mouse)-like 2 (SEZ6L2), transcript variant 1    | 2.41 | 1.02 | 1.00 | 1.07 | 1.14 | 1.22 | 1.12 | 0.97 |
| sLC      | ILMN | 1665994  | SILV     | Homo sapiens silver homolog (mouse) (SILV)                                              | 2.99 | 1.01 | 1.01 | 1.03 | 1.04 | 1.12 | 1.02 | 1.00 |
| sLC      | ILMN | 2142284  | SLC25A43 | Homo sapiens solute carrier family 25, member 43 (SLC25A43)                             | 3.43 | 0.70 | 0.64 | 0.81 | 1.32 | 0.89 | 0.79 | 0.78 |
| sLC      | ILMN | 1720311  | SLC25A46 | Homo sapiens solute carrier family 25, member 46 (SLC25A46)                             | 2.63 | 0.95 | 1.03 | 0.96 | 1.10 | 0.99 | 1.08 | 1.41 |
| sLC      | ILMN | 1799128  | SLC30A9  | Homo sapiens solute carrier family 30 (zinc transporter), member 9 (SLC30A9)            | 2.25 | 1.22 | 1.13 | 0.80 | 0.72 | 0.70 | 1.13 | 0.93 |
| sLC      | ILMN | 1706571  | SLC35D2  | Homo sapiens solute carrier family 35, member D2 (SLC35D2)                              | 1.79 | 0.98 | 0.78 | 1.08 | 1.06 | 0.76 | 0.79 | 0.76 |
| sLC      | ILMN | 1773643  | SLC38A9  | Homo sapiens solute carrier family 38, member 9 (SLC38A9)                               | 2.14 | 1.00 | 1.05 | 0.76 | 0.62 | 0.66 | 1.08 | 0.46 |
| sLC      | ILMN | 1694305  | SMS      | Homo sapiens spermine synthase (SMS)                                                    | 1.54 | 0.67 | 1.05 | 1.13 | 1.05 | 1.09 | 0.93 | 0.41 |
| sLC      | ILMN | 2413259  | SOC54    | Homo sapiens suppressor of cytokine signaling 4 (SOC54), transcript variant 1           | 1.62 | 1.14 | 1.00 | 1.09 | 1.08 | 1.09 | 1.11 | 0.95 |
| sLC      | ILMN | 2315694  | STRADA   | Homo sapiens STE20-related kinase adaptor alpha (STRADA), transcript variant 1          | 1.50 | 1.13 | 1.34 | 0.80 | 0.83 | 0.85 | 0.96 | 0.70 |
| sLC      | ILMN | 1750896  | STX17    | Homo sapiens syntaxin 17 (STX17)                                                        | 1.60 | 1.07 | 1.04 | 1.09 | 1.09 | 1.15 | 1.10 | 1.00 |
| sLC      | ILMN | 1735093  | TIMELESS | Homo sapiens timeless homolog (Drosophila) (TIMELESS)                                   | 1.72 | 1.16 | 1.08 | 0.91 | 0.95 | 0.97 | 0.98 | 0.49 |
| sLC      | ILMN | 1785191  | TMEM14A  | Homo sapiens transmembrane protein 14A (TMEM14A)                                        | 3.07 | 1.00 | 1.00 | 1.16 | 0.99 | 0.99 | 1.23 | 1.50 |
| sLC      | ILMN | 1685258  | TMEM14B  | Homo sapiens transmembrane protein 14B (TMEM14B)                                        | 2.67 | 0.88 | 0.84 | 1.06 | 1.15 | 0.78 | 0.88 | 1.07 |
| sLC      | ILMN | 1813796  | TMEM169  | Homo sapiens transmembrane protein 169 (TMEM169)                                        | 4.38 | 0.72 | 0.97 | 1.47 | 1.42 | 1.08 | 0.97 | 0.50 |
| sLC      | ILMN | 1748926  | TMEM209  | Homo sapiens transmembrane protein 209 (TMEM209)                                        | 1.80 | 0.98 | 0.95 | 1.19 | 1.04 | 1.10 | 1.26 | 0.82 |
| sLC      | ILMN | 2388070  | TMEM44   | Homo sapiens transmembrane protein 44 (TMEM44), transcript variant 1                    | 2.29 | 1.17 | 1.15 | 1.25 | 1.25 | 1.15 | 1.38 | 1.06 |
| sLC      | ILMN | 1805812  | TOR1A    | Homo sapiens torsin family 1, member A (torsin A) (TOR1A)                               | 1.73 | 0.75 | 0.85 | 0.73 | 0.61 | 0.76 | 1.20 | 1.37 |
| sLC      | ILMN | 2214197  | TP53INP1 | Homo sapiens tumor protein p53 inducible nuclear protein 1 (TP53INP1)                   | 2.24 | 1.20 | 1.07 | 0.74 | 0.96 | 0.66 | 1.06 | 0.67 |
| sLC      | ILMN | 1714108  | TP53INP1 | Homo sapiens tumor protein p53 inducible nuclear protein 1 (TP53INP1)                   | 1.66 | 1.16 | 0.78 | 0.85 | 0.96 | 0.97 | 1.08 | 0.81 |
| sLC      | ILMN | 1669881  | TSPAN13  | Homo sapiens tetraspanin 13 (TSPAN13)                                                   | 6.80 | 1.14 | 1.14 | 0.94 | 1.22 | 0.88 | 0.88 | 0.63 |
| sLC      | ILMN | 1803850  | TSPAN15  | Homo sapiens tetraspanin 15 (TSPAN15)                                                   | 1.54 | 1.14 | 0.94 | 1.09 | 0.97 | 1.07 | 1.27 | 0.78 |
| sLC      | ILMN | 18110228 | TTF2     | Homo sapiens transcription termination factor, RNA polymerase II (TTF2)                 | 3.00 | 0.96 | 0.91 | 1.01 | 1.34 | 0.91 | 0.87 | 0.93 |
| sLC      | ILMN | 1800612  | VBPI     | Homo sapiens von Hippel-Lindau binding protein 1 (VBPI)                                 | 2.25 | 0.90 | 0.79 | 1.00 | 1.08 | 0.95 | 1.06 | 1.53 |
| sLC      | ILMN | 1653771  | WDR63    | Homo sapiens WD repeat domain 63 (WDR63)                                                | 1.62 | 1.00 | 1.02 | 1.03 | 1.04 | 1.01 | 1.05 | 1.00 |
| sLC      | ILMN | 3237956  | ZC3H12C  | Homo sapiens zinc finger CCH1-type containing 12C (ZC3H12C)                             | 2.85 | 1.02 | 1.00 | 0.93 | 0.97 | 0.73 | 0.79 | 0.79 |
| sLC      | ILMN | 1684663  | ZDHHC13  | Homo sapiens zinc finger, DHHC-type containing 13 (ZDHHC13), transcript variant 1       | 2.59 | 1.49 | 1.17 | 1.28 | 1.41 | 1.10 | 0.99 | 0.94 |
| sLC      | ILMN | 1736901  | ZDHHC23  | Homo sapiens zinc finger, DHHC-type containing 23 (ZDHHC23), transcript variant 1       | 1.75 | 1.05 | 1.05 | 1.23 | 1.20 | 1.09 | 1.13 | 1.00 |
| sLC      | ILMN | 1798533  | ZNF22    | Homo sapiens zinc finger protein 22 (KOX 15) (ZNF22)                                    | 1.90 | 0.87 | 0.68 | 0.94 | 0.99 | 0.72 | 0.77 | 0.79 |
| sLC      | ILMN | 1810127  | ZNF789   | Homo sapiens zinc finger protein 789 (ZNF789), transcript variant 2                     | 2.31 | 1.03 | 1.07 | 1.09 | 1.13 | 1.05 | 1.07 | 1.22 |
| sLC      | ILMN | 1653163  | ZSCAN2   | Homo sapiens zinc finger and SCAN domain containing 2 (ZSCAN2)                          | 1.79 | 0.99 | 0.96 | 1.10 | 1.11 | 1.00 | 1.01 | 1.00 |
| sCD14-DC | ILMN | 2311674  | ADCY6    | Homo sapiens adenylate cyclase 6 (ADCY6), transcript variant 2                          | 1.00 | 1.60 | 1.11 | 1.00 | 1.02 | 1.00 | 1.00 | 0.99 |
| sCD14-DC | ILMN | 1794875  | AGPAT9   | Homo sapiens 1-acylglycerol-3-phosphate O-acyltransferase 9 (AGPAT9)                    | 0.91 | 3.03 | 0.88 | 1.19 | 0.68 | 0.88 | 0.78 | 0.78 |
| sCD14-DC | ILMN | 1752247  | AKAP13   | Homo sapiens A kinase (PRKA) anchor protein 13 (AKAP13), transcript variant 1           | 0.76 | 1.71 | 0.74 | 0.64 | 0.84 | 0.72 | 0.74 | 1.58 |
| sCD14-DC | ILMN | 2148847  | AKIRIN2  | Homo sapiens akirin 2 (AKIRIN2)                                                         | 0.84 | 1.92 | 1.08 | 0.96 | 0.48 | 0.58 | 0.74 | 1.28 |
| sCD14-DC | ILMN | 1812926  | ANTXR2   | Homo sapiens anthrax toxin receptor 2 (ANTXR2)                                          | 0.92 | 1.75 | 1.44 | 1.19 | 0.88 | 1.00 | 0.93 | 0.87 |
| sCD14-DC | ILMN | 1810229  | ARID4A   | Homo sapiens AT rich interactive domain 4A (RBP1-like) (ARID4A), transcript variant 1   | 1.10 | 2.51 | 1.37 | 0.90 | 1.01 | 0.84 | 0.89 | 2.09 |
| sCD14-DC | ILMN | 1792825  | ARIH2    | Homo sapiens ariadne homolog 2 (Drosophila) (ARIH2)                                     | 1.09 | 1.61 | 1.01 | 1.10 | 0.78 | 0.83 | 0.85 | 0.86 |
| sCD14-DC | ILMN | 1680579  | ATP2B4   | Homo sapiens ATPase, Ca++ transporting, plasma membrane 4 (ATP2B4)                      | 0.79 | 2.22 | 0.86 | 0.88 | 1.10 | 0.72 | 0.80 | 0.69 |
| sCD14-DC | ILMN | 2367753  | ATP2B4   | Homo sapiens ATPase, Ca++ transporting, plasma membrane 4 (ATP2B4)                      | 0.98 | 2.27 | 1.15 | 1.14 | 1.31 | 0.74 | 0.82 | 1.00 |
| sCD14-DC | ILMN | 2153332  | ATXN1    | Homo sapiens ataxin 1 (ATXN1)                                                           | 1.25 | 2.59 | 1.45 | 1.02 | 0.97 | 0.74 | 0.95 | 0.51 |
| sCD14-DC | ILMN | 2357438  | AURKA    | Homo sapiens aurora kinase A (AURKA), transcript variant 3                              | 1.24 | 1.58 | 1.45 | 0.85 | 0.90 | 0.85 | 1.04 | 0.48 |
| sCD14-DC | ILMN | 3247802  | BAT2L    | Homo sapiens HLA-B associated transcription 2-like (BAT2L)                              | 1.39 | 1.53 | 0.93 | 0.92 | 0.91 | 0.95 | 0.93 | 0.75 |
| sCD14-DC | ILMN | 1720850  | BAZZB    | Homo sapiens bromodomain adjacent to zinc finger domain, 2B (BAZZB)                     | 1.42 | 1.99 | 0.78 | 0.79 | 0.90 | 0.79 | 1.04 | 0.61 |
| sCD14-DC | ILMN | 1681644  | BIRC3    | Homo sapiens baculoviral IAP repeat-containing 3 (BIRC3), transcript variant 1          | 0.82 | 2.13 | 1.24 | 1.04 | 1.28 | 1.34 | 0.72 | 0.38 |
| sCD14-DC | ILMN | 1667510  | C12ORF65 | Homo sapiens chromosome 12 open reading frame 65 (C12orf65)                             | 1.24 | 1.68 | 1.29 | 1.12 | 1.24 | 1.12 | 0.93 | 0.82 |
| sCD14-DC | ILMN | 1742611  | C1ORF52  | Homo sapiens chromosome 1 open reading frame 52 (C1orf52)                               | 0.95 | 2.02 | 1.44 | 0.92 | 1.02 | 0.83 | 0.97 | 0.90 |
| sCD14-DC | ILMN | 2184612  | C3ORF52  | Homo sapiens chromosome 3 open reading frame 52 (C3orf52)                               | 0.97 | 3.79 | 1.44 | 0.99 | 0.99 | 0.93 | 0.92 | 0.65 |
| sCD14-DC | ILMN | 1776788  | C5ORF41  | Homo sapiens chromosome 5 open reading frame 41 (C5orf41)                               | 0.75 | 2.48 | 0.73 | 1.06 | 1.08 | 1.09 | 1.05 | 1.00 |
| sCD14-DC | ILMN | 3248941  | C6ORF225 | Homo sapiens chromosome 6 open reading frame 225 (C6orf225)                             | 1.34 | 1.68 | 1.36 | 1.06 | 1.02 | 1.03 | 1.06 | 0.81 |
| sCD14-DC | ILMN | 1657361  | CBX7     | Homo sapiens chromobox homolog 7 (CBX7)                                                 | 0.91 | 1.98 | 1.35 | 0.97 | 0.96 | 0.71 | 0.99 | 0.42 |
| sCD14-DC | ILMN | 1686135  | CCDC45   | Homo sapiens coiled-coil domain containing 45 (CCDC45)                                  | 0.91 | 2.25 | 1.34 | 0.74 | 0.71 | 0.69 | 0.80 | 1.48 |
| sCD14-DC | ILMN | 1761464  | CD74     | Homo sapiens CD74 molecule, major histocompatibility complex, class II, invariant chain | 1.20 | 1.76 | 1.01 | 1.17 | 1.23 | 0.98 | 0.97 | 0.99 |
| sCD14-DC | ILMN | 1691418  | CDRT4    | Homo sapiens CMT1A duplicated region transcript 4 (CDRT4)                               | 0.93 | 1.64 | 1.51 | 1.08 | 1.00 | 0.82 | 1.27 | 0.52 |
| sCD14-DC | ILMN | 2339284  | CHD2     | Homo sapiens chromodomain helicase DNA binding protein 2 (CHD2)                         | 0.91 | 2.08 | 1.03 | 1.33 | 1.35 | 0.96 | 0.99 | 2.01 |
| sCD14-DC | ILMN | 2063586  | CLIC4    | Homo sapiens chloride intracellular channel 4 (CLIC4), nuclear gene                     | 1.43 | 1.70 | 1.59 | 0.88 | 0.90 | 0.81 | 0.94 | 0.68 |
| sCD14-DC | ILMN | 2370624  | COL13A1  | Homo sapiens collagen, type XIII, alpha 1 (COL13A1), transcript variant 1               | 1.10 | 1.51 | 1.45 | 1.13 | 1.06 | 1.02 | 1.15 | 0.99 |
| sCD14-DC | ILMN | 1728180  | CROP     | Homo sapiens cisplatin resistance-associated overexpressed protein (CROP)               | 0.93 | 2.10 | 1.29 | 0.93 | 0.97 | 0.90 | 0.93 | 1.11 |
| sCD14-DC | ILMN | 1719290  | CRYZL1   | Homo sapiens crystallin, zeta (quinone reductase)-like 1 (CRYZL1), transcript variant 1 | 1.00 | 1.65 | 1.15 | 0.80 | 0.77 | 0.75 | 0.99 | 0.57 |
| sCD14-DC | ILMN | 2046470  | DAAM1    | Homo sapiens dishevelled associated activator of morphogenesis 1 (DAAM1)                | 1.38 | 2.75 | 1.47 | 1.30 | 1.35 | 1.01 | 0.95 | 0.82 |
| sCD14-DC | ILMN | 1809285  | DCP1A    | Homo sapiens DCP1 decapping enzyme homolog A (S. cerevisiae) (DCP1A)                    | 0.96 | 1.60 | 0.95 | 0.94 | 0.90 | 0.98 | 0.85 | 2.10 |
| sCD14-DC | ILMN | 2277523  | DIP2A    | Homo sapiens DIP2 disco-interacting protein 2 homolog A (Drosophila)                    | 1.06 | 1.88 | 1.05 | 0.93 | 1.08 | 0.92 | 1.04 | 0.64 |
| sCD14-DC | ILMN | 1758629  | DONSON   | Homo sapiens downstream neighbor of SON (DONSON)                                        | 1.09 | 2.04 | 1.12 | 1.19 | 1.11 | 1.00 | 1.04 | 0.97 |
| sCD14-DC | ILMN | 1679262  | DPYSL3   | Homo sapiens dihydropyrimidinase-like 3 (DPYSL3)                                        | 0.45 | 2.06 | 1.58 | 0.92 | 1.14 | 1.26 | 1.26 | 0.45 |
| sCD14-DC | ILMN | 1798210  | E2F7     | Homo sapiens E2F transcription factor 7 (E2F7)                                          | 0.95 | 4.21 | 1.29 | 0.87 | 0.93 | 0.84 | 0.71 | 0.67 |
| sCD14-DC | ILMN | 1724984  | EIF2AK3  | Homo sapiens eukaryotic translation initiation factor 2-alpha kinase 3 (EIF2AK3)        | 1.03 | 2.05 | 1.02 | 1.20 | 1.10 | 1.03 | 0.97 |      |

|          |      |         |              |                                                                                                    |      |      |      |      |      |      |      |      |
|----------|------|---------|--------------|----------------------------------------------------------------------------------------------------|------|------|------|------|------|------|------|------|
| sCD14-DC | ILMN | 1716821 | GORASP1      | Homo sapiens golgi reassembly stacking protein 1, 65kDa (GORASP1)                                  | 0.83 | 1.63 | 0.65 | 0.95 | 0.89 | 0.75 | 1.01 | 0.96 |
| sCD14-DC | ILMN | 1685115 | HEXIM1       | Homo sapiens hexamethylene bis-acetamide inducible 1 (HEXIM1)                                      | 0.93 | 2.19 | 1.23 | 1.11 | 0.93 | 0.85 | 0.83 | 0.70 |
| sCD14-DC | ILMN | 3270641 | HNRNP3       | Homo sapiens heterogeneous nuclear ribonucleoprotein H3 (2H9) (HNRNP3)                             | 1.30 | 1.95 | 1.48 | 0.94 | 0.96 | 0.88 | 1.06 | 1.33 |
| sCD14-DC | ILMN | 1831106 | HS.19193     | PREDICTED: Homo sapiens hypothetical LOC400043 (LOC400043)                                         | 1.12 | 3.51 | 1.37 | 1.02 | 0.98 | 1.06 | 1.15 | 1.19 |
| sCD14-DC | ILMN | 1901304 | HS.238996    | Homo sapiens mRNA; cDNA DKFZp761E11211 (from clone DKFZp761E11211)                                 | 1.01 | 1.84 | 1.43 | 1.35 | 1.32 | 1.05 | 1.00 | 0.98 |
| sCD14-DC | ILMN | 1873677 | HS.31037     | Homo sapiens cDNA FLJ35556 fis. clone SPLEN2004844                                                 | 0.93 | 1.89 | 1.45 | 1.37 | 0.94 | 1.04 | 1.17 | 0.70 |
| sCD14-DC | ILMN | 1907042 | HS.445414    | Homo sapiens cDNA FLJ41270 fis. clone BRAMY2036387                                                 | 0.86 | 2.25 | 1.24 | 1.03 | 0.95 | 1.11 | 0.97 | 0.92 |
| sCD14-DC | ILMN | 1883937 | HS.552282    | Homo sapiens mRNA; cDNA DKFZp313P0125 (from clone DKFZp313P0125)                                   | 1.03 | 1.70 | 1.38 | 0.98 | 1.05 | 1.28 | 1.14 | 0.97 |
| sCD14-DC | ILMN | 2237746 | ING3         | Homo sapiens inhibitor of growth family, member 3 (ING3), transcript variant 1                     | 1.19 | 1.77 | 1.54 | 0.80 | 0.89 | 0.81 | 0.87 | 2.14 |
| sCD14-DC | ILMN | 2169439 | ITGAV        | Homo sapiens integrin, alpha V (vitronectin receptor, alpha polypeptide)                           | 1.03 | 2.43 | 1.35 | 0.88 | 0.79 | 0.91 | 1.09 | 0.39 |
| sCD14-DC | ILMN | 1722532 | JMJD1A       | Homo sapiens jumonji domain containing 1A (JMJD1A)                                                 | 0.77 | 2.00 | 1.23 | 0.79 | 1.01 | 0.75 | 1.17 | 1.03 |
| sCD14-DC | ILMN | 1730917 | KMO          | Homo sapiens kynurenine 3-monooxygenase (kynurenine 3-hydroxylase)                                 | 0.79 | 2.39 | 1.18 | 0.90 | 0.78 | 0.90 | 1.27 | 0.45 |
| sCD14-DC | ILMN | 1689817 | LCOR         | Homo sapiens ligand dependent nuclear receptor corepressor (LCOR)                                  | 0.90 | 2.00 | 0.86 | 0.98 | 1.01 | 0.97 | 0.98 | 1.95 |
| sCD14-DC | ILMN | 2062381 | LCOR         | Homo sapiens ligand dependent nuclear receptor corepressor (LCOR)                                  | 0.86 | 1.96 | 1.28 | 0.74 | 0.78 | 0.81 | 0.95 | 1.77 |
| sCD14-DC | ILMN | 1727361 | LEMD3        | Homo sapiens LEM domain containing 3 (LEMD3)                                                       | 0.92 | 1.56 | 0.68 | 1.10 | 0.53 | 0.63 | 0.68 | 1.01 |
| sCD14-DC | ILMN | 3187254 | LOC100128016 | PREDICTED: Homo sapiens misc RNA (LOC100128016), miscRNA                                           | 1.04 | 2.01 | 1.28 | 0.88 | 0.84 | 0.90 | 0.83 | 0.97 |
| sCD14-DC | ILMN | 3241692 | LOC100129668 | PREDICTED: Homo sapiens hypothetical protein LOC100129668 (LOC100129668), miscRNA                  | 1.09 | 1.56 | 0.85 | 1.19 | 1.19 | 1.13 | 1.06 | 0.64 |
| sCD14-DC | ILMN | 3200322 | LOC387791    | PREDICTED: Homo sapiens misc RNA (LOC387791), miscRNA                                              | 1.04 | 1.55 | 1.10 | 1.12 | 0.91 | 0.95 | 0.91 | 0.92 |
| sCD14-DC | ILMN | 1665290 | LOC643995    | PREDICTED: Homo sapiens similar to Importin alpha-2 subunit (Karyopherin alpha-2)                  | 1.02 | 3.44 | 1.54 | 0.89 | 0.97 | 0.89 | 0.85 | 1.03 |
| sCD14-DC | ILMN | 3237368 | LOC644132    | PREDICTED: Homo sapiens misc RNA (LOC644132), miscRNA                                              | 0.84 | 1.54 | 1.13 | 1.21 | 0.88 | 0.75 | 0.89 | 0.81 |
| sCD14-DC | ILMN | 1712347 | LOC644422    | PREDICTED: Homo sapiens misc RNA (LOC644422), miscRNA                                              | 0.94 | 1.77 | 1.15 | 0.97 | 1.03 | 1.06 | 0.94 | 1.81 |
| sCD14-DC | ILMN | 3246060 | LOC654433    | Homo sapiens hypothetical LOC654433 (LOC654433), non-coding RNA                                    | 1.05 | 1.60 | 1.17 | 1.11 | 1.07 | 1.20 | 1.30 | 0.81 |
| sCD14-DC | ILMN | 2214997 | LRRCF1       | Homo sapiens leucine rich repeat (in FLII) interacting protein 1 (LRRCF1)                          | 0.86 | 1.64 | 1.08 | 0.87 | 1.01 | 0.93 | 0.80 | 1.27 |
| sCD14-DC | ILMN | 2301624 | MACF1        | Homo sapiens microtubule-actin crosslinking factor 1 (MACF1), transcript variant 1                 | 1.26 | 2.25 | 1.17 | 0.81 | 0.61 | 0.75 | 1.02 | 0.74 |
| sCD14-DC | ILMN | 1811367 | MAT2B        | Homo sapiens methionine adenosyltransferase II, beta (MAT2B), transcript variant 1                 | 1.48 | 1.54 | 1.23 | 0.72 | 0.63 | 0.57 | 0.85 | 0.70 |
| sCD14-DC | ILMN | 3248324 | MGC16384     | PREDICTED: Homo sapiens hypothetical protein MGC16384 (MGC16384), miscRNA                          | 1.14 | 1.52 | 1.15 | 1.09 | 1.12 | 1.06 | 1.06 | 0.90 |
| sCD14-DC | ILMN | 3245973 | MSL1         | Homo sapiens male-specific lethal 1 homolog (Drosophila) (MSL1)                                    | 0.83 | 1.98 | 1.24 | 0.96 | 0.98 | 0.76 | 1.04 | 0.65 |
| sCD14-DC | ILMN | 1656111 | MYLP         | Homo sapiens myosin regulatory light chain interacting protein (MYLP)                              | 0.52 | 2.39 | 1.09 | 0.60 | 0.47 | 0.50 | 0.56 | 0.77 |
| sCD14-DC | ILMN | 1724718 | NCK2         | Homo sapiens NCK adaptor protein 2 (NCK2), transcript variant 2                                    | 1.43 | 3.53 | 1.55 | 0.74 | 1.06 | 0.74 | 0.65 | 0.80 |
| sCD14-DC | ILMN | 1690325 | NFYA         | Homo sapiens nuclear transcription factor Y, alpha (NFYA), transcript variant 1                    | 1.07 | 1.74 | 1.24 | 1.05 | 1.11 | 1.07 | 1.07 | 0.92 |
| sCD14-DC | ILMN | 1728779 | NGLY1        | Homo sapiens N-glycanase 1 (NGLY1)                                                                 | 0.74 | 2.26 | 1.37 | 1.18 | 0.74 | 0.82 | 0.92 | 2.09 |
| sCD14-DC | ILMN | 1673962 | NUP205       | Homo sapiens nucleoporin 205kDa (NUP205)                                                           | 1.38 | 1.70 | 0.88 | 0.63 | 0.56 | 0.64 | 0.79 | 0.89 |
| sCD14-DC | ILMN | 2358652 | NXF1         | Homo sapiens nuclear RNA export factor 1 (NXF1), transcript variant 1                              | 0.65 | 1.95 | 1.01 | 0.71 | 0.63 | 0.57 | 0.69 | 0.82 |
| sCD14-DC | ILMN | 1708095 | PANK2        | Homo sapiens pantothenate kinase 2 (PANK2), transcript variant 3                                   | 1.24 | 1.68 | 1.11 | 0.99 | 0.83 | 0.77 | 0.76 | 0.96 |
| sCD14-DC | ILMN | 1781388 | PGM5         | Homo sapiens phosphoglucomutase 5 (PGM5)                                                           | 1.03 | 3.27 | 1.99 | 0.96 | 0.96 | 1.23 | 1.05 | 0.65 |
| sCD14-DC | ILMN | 1736015 | PHF17        | Homo sapiens PHD finger protein 17 (PHF17), transcript variant S                                   | 1.24 | 2.14 | 1.71 | 1.55 | 1.14 | 0.97 | 0.85 | 1.44 |
| sCD14-DC | ILMN | 1788689 | PHIP         | Homo sapiens pleckstrin homology domain interacting protein (PHIP)                                 | 1.03 | 1.81 | 1.02 | 0.98 | 0.93 | 0.71 | 0.80 | 1.48 |
| sCD14-DC | ILMN | 1815023 | PIM1         | Homo sapiens pim-1 oncogene (PIM1)                                                                 | 0.82 | 1.84 | 1.20 | 0.77 | 0.73 | 0.67 | 0.89 | 0.94 |
| sCD14-DC | ILMN | 1707748 | PIM3         | PREDICTED: Homo sapiens pim-3 oncogene (PIM3)                                                      | 0.85 | 1.66 | 1.06 | 1.06 | 1.08 | 0.93 | 0.69 | 1.89 |
| sCD14-DC | ILMN | 1786601 | PLAGL2       | Homo sapiens pleiomorphic adenoma gene-like 2 (PLAGL2)                                             | 0.86 | 1.84 | 1.10 | 0.74 | 0.87 | 0.82 | 1.09 | 1.13 |
| sCD14-DC | ILMN | 1662839 | PLEKHA1      | Homo sapiens pleckstrin homology domain containing, family A (phosphotyrosine-binding) 1 (PLEKHA1) | 1.51 | 1.76 | 1.50 | 1.03 | 1.18 | 0.82 | 0.74 | 0.40 |
| sCD14-DC | ILMN | 1696713 | POLA2        | Homo sapiens polymerase (DNA directed), alpha 2 (70kD subunit) (POLA2)                             | 0.93 | 1.56 | 1.29 | 0.69 | 0.92 | 1.02 | 0.82 | 0.48 |
| sCD14-DC | ILMN | 1660282 | POPCD2       | Homo sapiens popeye domain containing 2 (POPCD2)                                                   | 1.08 | 2.02 | 1.22 | 0.99 | 1.07 | 1.06 | 1.00 | 0.99 |
| sCD14-DC | ILMN | 1717477 | PSD3         | Homo sapiens pleckstrin and Sec7 domain containing 3 (PSD3), transcript variant 1                  | 1.11 | 1.50 | 1.03 | 1.03 | 1.03 | 1.02 | 1.01 | 0.89 |
| sCD14-DC | ILMN | 3237679 | PTAR1        | Homo sapiens protein prenyltransferase alpha subunit repeat containing domain 1 (PTAR1)            | 1.13 | 2.00 | 1.49 | 0.94 | 0.91 | 0.90 | 1.03 | 1.46 |
| sCD14-DC | ILMN | 2401155 | PUM1         | Homo sapiens pumilio homolog 1 (Drosophila) (PUM1), transcript variant 1                           | 0.87 | 1.71 | 1.17 | 0.95 | 0.73 | 0.91 | 0.78 | 0.81 |
| sCD14-DC | ILMN | 1670666 | RAB12        | Homo sapiens RAB12, member RAS oncogene family (RAB12)                                             | 1.22 | 2.15 | 1.02 | 0.91 | 0.89 | 0.95 | 0.94 | 2.11 |
| sCD14-DC | ILMN | 1727045 | RASGRP3      | Homo sapiens RAS guanyl releasing protein 3 (calcium and DAG-regulated) (RASGRP3)                  | 0.76 | 2.14 | 1.24 | 1.11 | 0.82 | 0.81 | 0.97 | 0.30 |
| sCD14-DC | ILMN | 2381197 | RNF19A       | Homo sapiens ring finger protein 19A (RNF19A), transcript variant 2                                | 1.07 | 2.15 | 1.27 | 0.91 | 1.02 | 0.85 | 0.96 | 0.99 |
| sCD14-DC | ILMN | 2117223 | ROD1         | Homo sapiens ROD1 regulator of differentiation 1 (S. pombe) (ROD1)                                 | 1.04 | 1.55 | 1.05 | 0.87 | 0.80 | 0.63 | 0.92 | 0.92 |
| sCD14-DC | ILMN | 3243461 | RPRD1B       | Homo sapiens regulation of nuclear pre-mRNA domain containing 1B (RPRD1B)                          | 0.98 | 1.67 | 1.14 | 1.07 | 1.01 | 0.67 | 1.20 | 2.45 |
| sCD14-DC | ILMN | 2334303 | SEC24B       | Homo sapiens SEC24 family, member B (S. cerevisiae) (SEC24B), transcript variant 1                 | 1.36 | 1.58 | 1.25 | 0.90 | 0.81 | 0.74 | 0.94 | 1.89 |
| sCD14-DC | ILMN | 1724959 | SEC31A       | Homo sapiens SEC31 homolog A (S. cerevisiae) (SEC31A), transcript variant 1                        | 1.28 | 1.56 | 1.08 | 1.09 | 1.24 | 0.97 | 1.07 | 1.04 |
| sCD14-DC | ILMN | 1689007 | SFRS14       | Homo sapiens splicing factor, arginine/serine-rich 14 (SFRS14), transcript variant 1               | 0.82 | 1.81 | 1.14 | 1.07 | 1.10 | 1.14 | 1.23 | 1.04 |
| sCD14-DC | ILMN | 1747020 | SGK3         | Homo sapiens serum/glucocorticoid regulated kinase family, member 3 (SGK3)                         | 0.89 | 1.76 | 1.34 | 0.77 | 0.82 | 0.75 | 1.25 | 0.73 |
| sCD14-DC | ILMN | 1715742 | SLC22A1      | Homo sapiens solute carrier family 22 (organic cation transporter), member 1 (SLC22A1)             | 1.05 | 1.85 | 1.05 | 1.06 | 1.15 | 1.06 | 1.05 | 0.99 |
| sCD14-DC | ILMN | 1768798 | SPAG9        | Homo sapiens sperm associated antigen 9 (SPAG9), transcript variant 2                              | 1.10 | 2.53 | 1.17 | 1.23 | 1.08 | 1.11 | 1.05 | 0.93 |
| sCD14-DC | ILMN | 1799104 | SPAG9        | Homo sapiens sperm associated antigen 9 (SPAG9)                                                    | 0.80 | 2.80 | 1.40 | 0.98 | 0.71 | 0.58 | 0.82 | 0.89 |
| sCD14-DC | ILMN | 2263718 | SPAG9        | Homo sapiens sperm associated antigen 9 (SPAG9)                                                    | 0.99 | 2.66 | 1.39 | 0.87 | 0.63 | 0.60 | 0.72 | 1.14 |
| sCD14-DC | ILMN | 1785202 | STAT4        | Homo sapiens signal transducer and activator of transcription 4 (STAT4)                            | 1.67 | 1.81 | 1.20 | 0.55 | 0.82 | 0.74 | 0.69 | 0.83 |
| sCD14-DC | ILMN | 1737535 | TAF4         | Homo sapiens TAF4 RNA polymerase II, TATA box binding protein (TAF4)                               | 0.80 | 1.77 | 0.99 | 0.87 | 0.87 | 0.96 | 1.13 | 0.64 |
| sCD14-DC | ILMN | 1803941 | TBC1D15      | Homo sapiens TBC1 domain family, member 15 (TBC1D15)                                               | 0.82 | 1.70 | 0.91 | 1.29 | 0.82 | 0.60 | 0.78 | 0.82 |
| sCD14-DC | ILMN | 1703891 | TBC1D9       | Homo sapiens TBC1 domain family, member 9 (with GRAM domain) (TBC1D9)                              | 1.35 | 1.61 | 1.17 | 1.24 | 1.22 | 1.17 | 1.16 | 0.94 |
| sCD14-DC | ILMN | 1657983 | TBRF2IP      | Homo sapiens telomeric repeat binding factor 2, interacting protein (TBRF2IP)                      | 0.81 | 1.68 | 0.81 | 0.83 | 0.84 | 0.71 | 0.88 | 0.88 |
| sCD14-DC | ILMN | 2318638 | TGIF1        | Homo sapiens TGFB-induced factor homeobox 1 (TGIF1), transcript variant 1                          | 1.08 | 2.26 | 1.44 | 0.86 | 0.64 | 0.71 | 0.76 | 0.73 |
| sCD14-DC | ILMN | 1724863 | TICAM1       | Homo sapiens toll-like receptor adaptor molecule 1 (TICAM1), transcript variant 1                  | 0.63 | 1.80 | 1.17 | 1.04 | 0.60 | 0.60 | 0.71 | 0.68 |
| sCD14-DC | ILMN | 1748884 | TOB2         | Homo sapiens transducer of ERBB2, 2 (TOB2)                                                         | 1.04 | 2.02 | 1.49 | 1.07 | 0.92 | 0.90 | 0.87 | 0.71 |
| sCD14-DC | ILMN | 3247223 | TPBG         | Homo sapiens trophoblast glycoprotein (TPBG)                                                       | 1.14 | 1.72 | 1.09 | 1.06 | 1.06 | 1.06 | 1.03 | 1.00 |
| sCD14-DC | ILMN | 1731043 | TRA2A        | Homo sapiens transformer 2 alpha homolog (Drosophila) (TRA2A)                                      | 0.72 | 2.68 | 1.31 | 0.81 | 0.75 | 0.87 | 0.77 | 1.00 |
| sCD14-DC | ILMN | 1682316 | TRIM33       | Homo sapiens tripartite motif-containing 33 (TRIM33), transcript variant 1                         | 1.16 | 2.65 | 1.24 | 0.90 | 0.78 | 0.70 | 1.04 | 1.31 |
| sCD14-DC | ILMN | 1783771 | UBEZ3        | PREDICTED: Homo sapiens ubiquitin-conjugating enzyme E2Z (putative)                                | 0.94 | 2.06 | 1.17 | 1.27 | 1.07 | 1.40 | 0.95 | 0.76 |
| sCD14-DC | ILMN | 1780887 | USP21        | Homo sapiens ubiquitin specific peptidase 21 (USP21), transcript variant 1                         | 0.93 | 2.00 | 1.10 | 0.85 | 1.02 | 0.89 | 1.08 | 0.95 |
| sCD14-DC | ILMN | 1739454 | USP34        | Homo sapiens ubiquitin specific peptidase 34 (USP34)                                               | 1.15 | 1.86 | 1.10 | 0.99 | 1.05 | 1.04 | 0.97 | 1.06 |
| sCD14-DC | ILMN | 2414826 | YPS13A       | Homo sapiens vacuolar protein sorting 13 homolog A (S. cerevisiae) (YPS13A)                        | 1.14 | 1.65 | 1.10 | 1.06 | 1.08 | 1.02 | 1.02 | 0.95 |
| sCD14-DC | ILMN | 1745852 | WDR33        | Homo sapiens WD repeat domain 33 (WDR33), transcript variant 3                                     | 1.12 | 2.55 | 1.15 | 0.94 | 1.07 | 0.95 | 1.00 | 1.36 |
| sCD14-DC | ILMN | 1807379 | WHSC1L1      | Homo sapiens Wolf-Hirschhorn syndrome candidate 1-like 1 (WHSC1L1)                                 | 0.90 | 2.25 | 1.47 | 1.01 | 1.24 | 1.00 | 0.95 | 0.78 |
| sCD14+DC | ILMN | 1653203 | EFEMP2       | Homo sapiens EGF-containing fibulin-like extracellular matrix protein 2 (EFEMP2)                   | 0.87 | 1.15 | 1.54 | 1.14 | 0.85 | 0.94 | 0.78 | 0.35 |
| sCD14+DC | ILMN | 1791635 | LOC652844    | PREDICTED: Homo sapiens similar to phosphodiesterase 4D interacting protein 1 (LOC652844), miscRNA | 1.00 | 1.17 | 1.51 | 1.44 | 1.13 | 1.04 | 1.14 | 0.96 |
| sCD14+DC | ILMN | 1748751 | NLF2         | PREDICTED: Homo sapiens nuclear localized factor 2 (NLF2)                                          | 0.87 | 2.10 | 3.43 | 1.31 | 0.93 | 1.07 | 1.06 | 0.88 |
| sCD14+DC | ILMN | 1697220 | NTSE         | Homo sapiens 5'-nucleotidase, ecto (CD73) (NTSE)                                                   | 1.21 | 1.18 | 3.07 | 0.86 | 0.89 | 0.94 | 1.16 | 0.98 |
| sCD14+DC | ILMN | 1751464 | TNFSF9       | Homo sapiens tumor necrosis factor (ligand) superfamily, member 9 (TNFSF9)                         | 0.97 | 1.39 | 2.05 | 0.98 | 0.94 | 0.94 | 1.02 | 1.80 |
| vLC      | ILMN | 2389013 | ADRM1        | Homo sapiens adhesion regulating molecule 1 (ADRM1), transcript variant 1                          | 1.11 | 1.03 | 0.96 | 1.57 | 1.09 | 1.09 | 1.09 | 0.99 |
| vLC      | ILMN | 2179726 | C16ORF93     | Homo sapiens chromosome 16 open reading frame 93 (C16orf93)                                        | 0.98 | 0.93 | 0.74 | 1.83 | 1.15 | 1.10 | 0.87 | 1.27 |
| vLC      | ILMN | 1669123 | C10RF187     | Homo sapiens chromosome 10 open reading frame 187 (C10orf187)                                      | 1.19 | 1.04 | 1.06 | 1.82 | 1.07 | 1.24 | 1.03 | 1.00 |
| vLC      | ILMN | 1711573 | CD96         | Homo sapiens CD96 molecule (CD96), transcript variant 1                                            | 1.22 | 1.04 | 1.13 | 1.50 | 1.41 | 1.50 | 1.40 | 1.00 |
| vLC      | ILMN | 1782439 | CNN3         | Homo sapiens calponin 3, acidic (CNN3)                                                             | 1.31 | 0.91 | 0.80 | 2.13 | 1.51 | 1.04 | 0.82 | 0.37 |
| vLC      | ILMN | 1758128 | CYGB         | Homo sapiens cytoglobin (CYGB)                                                                     | 0.98 | 1.19 | 0.99 | 1.58 | 0.91 | 1.38 | 1.04 | 0.71 |
| vLC      | ILMN | 1711650 | KCNE1L       | Homo sapiens KCNE1-like (KCNE1L)                                                                   | 0.97 | 1.16 | 1.36 | 2.06 | 1.52 | 1.32 | 0.95 | 0.99 |
| vLC      | ILMN | 1801632 | KRT5         | Homo sapiens keratin 5 (KRT5)                                                                      |      |      |      |      |      |      |      |      |

|           |      |         |           |                                                                                                       |      |      |      |      |      |      |      |      |
|-----------|------|---------|-----------|-------------------------------------------------------------------------------------------------------|------|------|------|------|------|------|------|------|
| vCD14-DC  | ILMN | 1651496 | HIST1H2BD | Homo sapiens histone cluster 1, H2bd (HIST1H2BD), transcript variant 1                                | 1.37 | 1.31 | 1.17 | 1.66 | 1.64 | 0.95 | 0.88 | 0.56 |
| vCD14-DC  | ILMN | 1699521 | KIAA1641  | PREDICTED: Homo sapiens KIAA1641, transcript variant 7 (KIAA1641)                                     | 1.75 | 0.97 | 0.89 | 1.71 | 1.74 | 1.45 | 1.50 | 1.47 |
| vCD14-DC  | ILMN | 2249018 | LOC389816 | Homo sapiens cytokerin associated protein (LOC389816)                                                 | 1.25 | 0.99 | 1.10 | 1.19 | 1.61 | 1.08 | 1.08 | 0.95 |
| vCD14-DC  | ILMN | 1652072 | MGC42105  | Homo sapiens serine/threonine-protein kinase NIM1 (MGC42105)                                          | 1.18 | 1.00 | 1.03 | 1.15 | 1.56 | 1.04 | 1.00 | 0.97 |
| vCD14-DC  | ILMN | 2348090 | MRPL55    | Homo sapiens mitochondrial ribosomal protein L55 (MRPL55), nuclear                                    | 1.04 | 1.13 | 0.81 | 1.28 | 1.54 | 1.17 | 0.81 | 1.10 |
| vCD14-DC  | ILMN | 1738147 | NES       | Homo sapiens nestin (NES)                                                                             | 1.01 | 1.02 | 1.03 | 1.17 | 1.50 | 1.14 | 1.03 | 1.00 |
| vCD14-DC  | ILMN | 2141157 | RANBP9    | Homo sapiens RAN binding protein 9 (RANBP9)                                                           | 1.43 | 1.11 | 1.17 | 1.32 | 1.50 | 1.01 | 1.12 | 0.98 |
| vCD14-DC  | ILMN | 3249059 | SNHG12    | Homo sapiens small nucleolar RNA host gene 12 (non-protein coding)                                    | 0.91 | 1.22 | 1.13 | 1.32 | 1.73 | 1.04 | 1.11 | 0.82 |
| vCD14-DC  | ILMN | 1751963 | ZCWPW1    | Homo sapiens zinc finger, CW type with PWWP domain 1 (ZCWPW1)                                         | 1.18 | 0.76 | 0.43 | 1.35 | 1.89 | 1.03 | 0.93 | 0.65 |
| vCD14-DC  | ILMN | 1684591 | ZNF434    | Homo sapiens zinc finger protein 434 (ZNF434)                                                         | 1.17 | 0.86 | 1.11 | 1.40 | 1.62 | 1.07 | 1.16 | 0.80 |
| vCD14+ DC | ILMN | 1687556 | DAPL1     | Homo sapiens death associated protein-like 1 (DAPL1)                                                  | 1.05 | 1.03 | 1.09 | 1.83 | 1.78 | 1.54 | 1.27 | 1.00 |
| vCD14+ DC | ILMN | 1792497 | HRB       | Homo sapiens HIV-1 Rev binding protein (HRB)                                                          | 0.91 | 1.10 | 1.17 | 1.32 | 1.15 | 1.58 | 1.31 | 0.87 |
| vCD14+ DC | ILMN | 2216265 | LONP2     | Homo sapiens lon peptidase 2, peroxisomal (LONP2)                                                     | 0.71 | 0.77 | 0.83 | 1.15 | 1.13 | 1.67 | 1.41 | 0.60 |
| vCD14+ DC | ILMN | 2061435 | MEG3      | Homo sapiens maternally expressed 3 (non-protein coding) (MEG3), transcribed                          | 0.98 | 0.96 | 1.01 | 1.59 | 1.20 | 1.59 | 1.15 | 0.94 |
| vCD14+ DC | ILMN | 1782331 | TDG       | Homo sapiens thymine-DNA glycosylase (TDG)                                                            | 0.82 | 0.87 | 0.82 | 1.27 | 1.44 | 1.53 | 1.02 | 0.57 |
| vCD14+ DC | ILMN | 1710268 | ZNF385D   | Homo sapiens zinc finger protein 385D (ZNF385D)                                                       | 0.99 | 0.98 | 1.06 | 1.46 | 1.21 | 1.58 | 1.22 | 0.96 |
| vMF       | ILMN | 2061446 | AAACL1    | Homo sapiens arylacetamide deacetylase-like 1 (AAACL1)                                                | 0.97 | 0.93 | 0.85 | 1.28 | 1.02 | 1.09 | 1.77 | 0.98 |
| vMF       | ILMN | 1698777 | ADCK1     | Homo sapiens aarF domain containing kinase 1 (ADCK1)                                                  | 1.05 | 1.00 | 1.00 | 1.00 | 1.00 | 1.09 | 1.75 | 1.39 |
| vMF       | ILMN | 1663132 | ADCK2     | Homo sapiens aarF domain containing kinase 2 (ADCK2)                                                  | 0.75 | 0.86 | 0.66 | 1.05 | 0.85 | 0.91 | 1.60 | 0.85 |
| vMF       | ILMN | 1794825 | ALDH3A2   | Homo sapiens aldehyde dehydrogenase 3 family, member A2 (ALDH3A2)                                     | 0.84 | 0.75 | 1.31 | 0.67 | 0.72 | 0.90 | 1.98 | 0.46 |
| vMF       | ILMN | 1724040 | ANKRD57   | Homo sapiens ankyrin repeat domain 57 (ANKRD57)                                                       | 0.74 | 0.92 | 2.52 | 0.91 | 0.92 | 1.02 | 2.94 | 0.71 |
| vMF       | ILMN | 1803779 | AP2A2     | Homo sapiens adaptor-related protein complex 2, alpha 2 subunit (AP2A2)                               | 1.28 | 1.07 | 0.91 | 1.13 | 1.00 | 1.19 | 1.53 | 0.90 |
| vMF       | ILMN | 1651574 | AQP3      | Homo sapiens aquaporin 3 (Gill blood group) (AQP3)                                                    | 1.11 | 1.06 | 1.21 | 2.01 | 1.97 | 1.49 | 1.73 | 1.00 |
| vMF       | ILMN | 1727390 | ATPAF2    | Homo sapiens ATP synthase mitochondrial F1 complex assembly factor 2 (ATPAF2)                         | 1.24 | 1.00 | 1.09 | 1.13 | 1.11 | 1.15 | 1.69 | 1.01 |
| vMF       | ILMN | 1656045 | BRUNOL6   | Homo sapiens bruno-like 6, RNA binding protein (Drosophila) (BRUNOL6)                                 | 1.01 | 0.95 | 0.86 | 1.06 | 1.01 | 1.09 | 2.51 | 0.97 |
| vMF       | ILMN | 2213297 | C11ORF54  | Homo sapiens chromosome 11 open reading frame 54 (C11orf54)                                           | 1.36 | 0.98 | 0.94 | 1.13 | 1.16 | 1.17 | 1.55 | 0.75 |
| vMF       | ILMN | 1707137 | C17ORF97  | Homo sapiens chromosome 17 open reading frame 97 (C17orf97)                                           | 1.60 | 0.74 | 0.85 | 1.35 | 1.07 | 1.17 | 1.82 | 1.29 |
| vMF       | ILMN | 1748916 | C18ORF55  | Homo sapiens chromosome 18 open reading frame 55 (C18orf55)                                           | 1.33 | 0.92 | 0.98 | 1.05 | 1.03 | 1.13 | 1.97 | 0.89 |
| vMF       | ILMN | 2182531 | C18ORF55  | Homo sapiens chromosome 18 open reading frame 55 (C18orf55)                                           | 1.29 | 0.49 | 0.90 | 0.77 | 0.59 | 0.72 | 1.14 | 0.34 |
| vMF       | ILMN | 1718712 | C20ORF177 | Homo sapiens chromosome 20 open reading frame 177 (C20orf177)                                         | 1.39 | 0.87 | 0.88 | 1.16 | 1.07 | 1.12 | 1.52 | 0.79 |
| vMF       | ILMN | 1655572 | C6ORF57   | PREDICTED: Homo sapiens chromosome 6 open reading frame 59 (C6orf59)                                  | 0.99 | 0.99 | 1.07 | 1.02 | 1.03 | 1.18 | 2.32 | 0.99 |
| vMF       | ILMN | 3241996 | C6ORF59   | Homo sapiens chromosome 6 open reading frame 59 (C6orf59), non-coding                                 | 0.99 | 0.99 | 1.00 | 1.24 | 1.11 | 1.09 | 1.76 | 1.05 |
| vMF       | ILMN | 1777740 | C8ORF55   | Homo sapiens chromosome 8 open reading frame 55 (C8orf55)                                             | 1.13 | 0.87 | 0.76 | 1.51 | 1.17 | 1.06 | 2.01 | 0.81 |
| vMF       | ILMN | 2365307 | CD276     | Homo sapiens CD276 molecule (CD276), transcript variant 1 XM_945485.1                                 | 1.11 | 1.01 | 1.11 | 0.98 | 0.97 | 1.13 | 1.67 | 1.00 |
| vMF       | ILMN | 2143685 | CLDN7     | Homo sapiens claudin 7 (CLDN7)                                                                        | 1.01 | 0.97 | 0.94 | 2.85 | 2.17 | 1.50 | 2.35 | 0.96 |
| vMF       | ILMN | 1653708 | CORO1B    | Homo sapiens coronin, actin binding protein, 1B (CORO1B), transcript variant 1                        | 1.08 | 0.91 | 0.81 | 1.39 | 1.10 | 1.13 | 1.64 | 0.87 |
| vMF       | ILMN | 2198185 | CXORF12   | Homo sapiens chromosome X open reading frame 12 (Cxorf12)                                             | 1.05 | 1.15 | 1.02 | 1.40 | 1.06 | 1.21 | 1.85 | 1.00 |
| vMF       | ILMN | 2355463 | CYFIP1    | Homo sapiens cytoplasmic FMR1 interacting protein 1 (CYFIP1), transcript variant 1                    | 1.34 | 0.96 | 0.97 | 0.80 | 0.67 | 0.86 | 1.98 | 0.57 |
| vMF       | ILMN | 1760509 | EOMES     | Homo sapiens eomesodermin homolog (Xenopus laevis) (EOMES)                                            | 1.19 | 1.05 | 1.16 | 1.65 | 1.54 | 1.29 | 1.58 | 1.00 |
| vMF       | ILMN | 1770245 | EPB41L5   | Homo sapiens erythrocyte membrane protein band 4.1 like 5 (EPB41L5)                                   | 1.01 | 1.01 | 1.02 | 1.09 | 1.02 | 1.14 | 1.66 | 1.00 |
| vMF       | ILMN | 2367384 | EPHB2     | Homo sapiens EPH receptor B2 (EPHB2), transcript variant 2                                            | 1.00 | 0.97 | 0.94 | 0.97 | 0.94 | 1.25 | 2.14 | 0.95 |
| vMF       | ILMN | 1781536 | FAH       | Homo sapiens fumarylacetoacetate hydrolase (fumarylacetoacetase) (FAH)                                | 0.96 | 1.00 | 1.18 | 0.87 | 0.94 | 1.30 | 2.43 | 0.95 |
| vMF       | ILMN | 1804863 | FKBP15    | Homo sapiens FK506 binding protein 15, 133kDa (FKBP15)                                                | 1.02 | 0.95 | 1.00 | 0.97 | 0.96 | 1.47 | 3.47 | 1.17 |
| vMF       | ILMN | 1773553 | FLJ46906  | PREDICTED: Homo sapiens hypothetical gene supported by AK12887                                        | 0.92 | 0.91 | 1.24 | 1.21 | 0.93 | 1.51 | 2.84 | 1.08 |
| vMF       | ILMN | 1678961 | FRMD4A    | Homo sapiens FERM domain containing 4A (FRMD4A)                                                       | 0.97 | 0.96 | 0.95 | 1.12 | 0.98 | 1.23 | 2.78 | 0.92 |
| vMF       | ILMN | 1743367 | FZD4      | Homo sapiens frizzled homolog 4 (Drosophila) (FZD4)                                                   | 1.53 | 0.83 | 0.95 | 1.35 | 1.11 | 1.38 | 2.25 | 0.83 |
| vMF       | ILMN | 1757186 | GIMAP1    | Homo sapiens GTPase, IMAP family member 1 (GIMAP1)                                                    | 1.00 | 0.99 | 1.00 | 0.97 | 0.98 | 1.23 | 2.20 | 0.98 |
| vMF       | ILMN | 2226223 | GJB6      | Homo sapiens gap junction protein, beta 6 (GJB6)                                                      | 1.01 | 1.00 | 1.02 | 1.86 | 1.72 | 1.16 | 1.80 | 0.97 |
| vMF       | ILMN | 2217513 | GLB1L     | Homo sapiens galactosidase, beta 1-like (GLB1L)                                                       | 0.97 | 1.00 | 1.08 | 1.02 | 1.07 | 1.16 | 1.81 | 1.00 |
| vMF       | ILMN | 2407389 | GPNMB     | Homo sapiens glycoprotein (transmembrane) nmb (GPNMB), transcript variant 1                           | 0.77 | 0.76 | 0.74 | 0.89 | 0.55 | 2.08 | 7.61 | 0.73 |
| vMF       | ILMN | 2333766 | HISPPD2A  | Homo sapiens histidine acid phosphatase domain containing 2A (HISPPD2A)                               | 1.11 | 0.94 | 0.81 | 1.16 | 1.08 | 1.02 | 1.59 | 0.93 |
| vMF       | ILMN | 1861270 | HS.374023 | Homo sapiens mRNA; cDNA DKFZp686N1644 (from clone DKFZp686N1644)                                      | 1.12 | 1.08 | 1.10 | 1.08 | 1.03 | 1.05 | 2.00 | 0.99 |
| vMF       | ILMN | 1738237 | HSlBP3    | Homo sapiens HCLSI binding protein 3 (HSlBP3)                                                         | 1.00 | 0.99 | 0.99 | 0.97 | 1.02 | 1.01 | 1.54 | 1.02 |
| vMF       | ILMN | 1696432 | IDH1      | Homo sapiens isocitrate dehydrogenase 1 (NADP+), soluble (IDH1)                                       | 1.22 | 0.96 | 1.01 | 1.00 | 1.09 | 1.51 | 6.04 | 1.07 |
| vMF       | ILMN | 1714820 | ITGB1     | Homo sapiens integrin, beta 1 (fibronectin receptor, beta polypeptide, alpha 5 beta 1)                | 1.54 | 1.18 | 1.54 | 1.31 | 1.09 | 1.18 | 2.09 | 1.00 |
| vMF       | ILMN | 1796755 | ITGB5     | Homo sapiens integrin, beta 5 (ITGB5) XM_944688 XM_944693                                             | 0.92 | 0.87 | 0.95 | 0.91 | 0.84 | 1.21 | 3.03 | 0.80 |
| vMF       | ILMN | 2297765 | KCNMA1    | Homo sapiens potassium large conductance calcium-activated channel, non-persistent 1 (KCNMA1)         | 0.99 | 1.22 | 1.14 | 1.23 | 0.96 | 1.44 | 2.87 | 0.98 |
| vMF       | ILMN | 1768814 | KLHL6     | Homo sapiens kelch-like 6 (Drosophila) (KLHL6)                                                        | 0.99 | 1.04 | 1.23 | 1.18 | 1.08 | 1.19 | 1.97 | 1.12 |
| vMF       | ILMN | 2326953 | LAT2      | Homo sapiens linker for activation of T cells family, member 2 (LAT2)                                 | 0.99 | 1.10 | 1.20 | 0.90 | 1.00 | 1.20 | 1.93 | 1.13 |
| vMF       | ILMN | 1807556 | LOC146177 | PREDICTED: Homo sapiens hypothetical protein LOC146177 (LOC146177)                                    | 1.01 | 1.03 | 0.90 | 0.92 | 0.94 | 1.14 | 1.91 | 1.02 |
| vMF       | ILMN | 1771286 | LOC653513 | PREDICTED: Homo sapiens similar to phosphodiesterase 4D interacting protein 1                         | 1.10 | 1.16 | 1.81 | 1.45 | 1.22 | 1.31 | 1.96 | 0.96 |
| vMF       | ILMN | 1675542 | LOC729148 | PREDICTED: Homo sapiens similar to lethal (2) k00619 CG4775-PA1                                       | 0.95 | 0.88 | 0.99 | 0.86 | 0.69 | 0.90 | 2.35 | 1.02 |
| vMF       | ILMN | 1712719 | MAP7      | Homo sapiens microtubule-associated protein 7 (MAP7)                                                  | 1.07 | 1.00 | 1.16 | 1.50 | 1.62 | 1.39 | 1.97 | 2.19 |
| vMF       | ILMN | 2290118 | MEGF9     | Homo sapiens multiple EGF-like-domains 9 (MEGF9)                                                      | 0.76 | 0.75 | 1.16 | 0.97 | 0.92 | 1.16 | 3.02 | 0.64 |
| vMF       | ILMN | 1768035 | MMP12     | Homo sapiens matrix metalloproteinase 12 (macrophage elastase) (MMP12)                                | 1.03 | 1.03 | 1.40 | 0.92 | 0.97 | 1.45 | 2.80 | 1.00 |
| vMF       | ILMN | 1795119 | MYH3      | Homo sapiens myosin, heavy chain 3, skeletal muscle, embryonic (MYH3)                                 | 0.87 | 0.74 | 1.10 | 1.04 | 0.92 | 1.30 | 1.93 | 0.71 |
| vMF       | ILMN | 1724907 | NUD13     | Homo sapiens nudix (nucleoside diphosphate related moiety X)-type 13 (NUD13)                          | 0.86 | 0.72 | 0.98 | 0.75 | 0.89 | 0.92 | 1.88 | 1.39 |
| vMF       | ILMN | 1672122 | P4HTM     | Homo sapiens prolyl 4-hydroxylase, transmembrane (endoplasmic reticulum)                              | 1.08 | 0.97 | 1.00 | 1.15 | 1.08 | 1.12 | 2.03 | 1.27 |
| vMF       | ILMN | 1812552 | PHCA      | Homo sapiens phytylceramidease, alkaline (PHCA)                                                       | 0.71 | 0.67 | 0.75 | 1.00 | 0.74 | 1.42 | 2.46 | 1.36 |
| vMF       | ILMN | 1799860 | PIGM      | Homo sapiens phosphatidylinositol glycan anchor biosynthesis, class M (PIGM)                          | 1.03 | 0.98 | 1.04 | 1.14 | 1.04 | 1.24 | 1.82 | 1.00 |
| vMF       | ILMN | 1666924 | PINK1     | Homo sapiens PTEN induced putative kinase 1 (PINK1), nuclear gene                                     | 0.81 | 0.68 | 0.66 | 1.28 | 0.71 | 0.91 | 1.73 | 0.31 |
| vMF       | ILMN | 1791569 | PLXNA1    | Homo sapiens plexin A1 (PLXNA1)                                                                       | 1.26 | 1.01 | 1.01 | 1.12 | 1.00 | 1.20 | 1.62 | 1.77 |
| vMF       | ILMN | 1800164 | PPF1A1    | Homo sapiens protein tyrosine phosphatase, receptor type, f polypeptide 1 (PPF1A1)                    | 0.67 | 1.00 | 0.64 | 0.95 | 0.64 | 0.97 | 1.63 | 0.83 |
| vMF       | ILMN | 2403889 | PRMT5     | Homo sapiens protein arginine methyltransferase 5 (PRMT5), transcript variant 1                       | 1.26 | 0.90 | 1.08 | 1.50 | 1.53 | 1.39 | 1.92 | 1.19 |
| vMF       | ILMN | 1713829 | PTGES     | Homo sapiens prostaglandin H synthase (PTGES)                                                         | 0.78 | 0.76 | 0.83 | 0.53 | 0.64 | 0.94 | 3.41 | 0.75 |
| vMF       | ILMN | 1714393 | RAB24     | Homo sapiens RAB24, member RAS oncogene family (RAB24), transcript variant 1                          | 0.93 | 0.95 | 1.17 | 1.10 | 1.09 | 1.32 | 2.01 | 1.56 |
| vMF       | ILMN | 1815264 | RHBDD3    | Homo sapiens rhomboid domain containing 3 (RHBDD3)                                                    | 1.04 | 0.99 | 0.98 | 1.11 | 0.96 | 1.21 | 1.86 | 1.00 |
| vMF       | ILMN | 2294976 | RNASE4    | Homo sapiens ribonuclease, RNase A family, 4 (RNASE4), transcript variant 1                           | 0.98 | 1.08 | 1.26 | 1.09 | 1.01 | 1.17 | 1.60 | 1.00 |
| vMF       | ILMN | 1718960 | SERPINB8  | Homo sapiens serpin peptidase inhibitor, clade B (ovalbumin), member 8 (SERPINB8)                     | 0.80 | 0.79 | 0.82 | 1.22 | 0.83 | 1.11 | 1.54 | 1.07 |
| vMF       | ILMN | 1767337 | SFXN5     | Homo sapiens sideroflexin 5 (SFXN5)                                                                   | 1.03 | 1.00 | 0.97 | 1.01 | 1.12 | 1.17 | 1.97 | 1.21 |
| vMF       | ILMN | 1665538 | SKP2      | Homo sapiens S-phase kinase-associated protein 2 (p45) (SKP2), transcript variant 1                   | 0.69 | 0.76 | 1.01 | 0.91 | 1.04 | 0.83 | 1.58 | 0.91 |
| vMF       | ILMN | 1807894 | SLC7A8    | Homo sapiens solute carrier family 7 (cationic amino acid transporter, y subfamily) member 8 (SLC7A8) | 1.13 | 0.92 | 0.97 | 0.85 | 0.84 | 1.41 | 3.26 | 0.93 |
| vMF       | ILMN | 1709772 | SNX5      | Homo sapiens sorting nexin 5 (SNX5), transcript variant 2                                             | 1.03 | 1.25 | 1.38 | 1.01 | 0.95 | 1.36 | 1.94 | 0.82 |
| vMF       | ILMN | 1699100 | SOAT1     | Homo sapiens sterol O-acyltransferase 1 (SOAT1), transcript variant 68                                | 0.98 | 0.98 | 0.99 | 1.19 | 1.02 | 1.23 | 2.01 | 1.18 |
| vMF       | ILMN | 2197577 | SPRR2C    | Homo sapiens small proline-rich protein 2C (pseudogene) (SPRR2C), transcript variant 1                | 1.06 | 0.97 | 1.07 | 2.00 | 2.03 | 1.21 | 1.75 | 0.84 |
| vMF       | ILMN | 1699887 | ST14      | Homo sapiens suppression of tumorigenicity 14 (colon carcinoma, metastasis) (ST14)                    | 0.98 | 0.97 | 0.93 | 1.39 | 1.17 | 1.29 | 2.13 | 1.08 |
| vMF       | ILMN | 2216637 | STK32B    | Homo sapiens serine/threonine kinase 32B (STK32B)                                                     | 1.05 | 1.03 | 1.12 | 1.38 | 0.96 | 1.19 | 1.53 | 1.00 |
| vMF       | ILMN | 1791067 | TESK1     | Homo sapiens testis-specific kinase 1 (TESK1)                                                         | 0.96 | 1.30 | 1.07 | 1.29 | 1.08 | 1.17 | 1.65 | 1.04 |
| vMF       | ILMN | 1736527 | TFPC2L1   | Homo sapiens transcription factor CP2-like 1 (TFPC2L1)                                                | 1.01 | 1.00 | 1.02 | 1.25 | 1.11 | 1.18 | 1.60 | 0.94 |
| vMF       | ILMN | 1764826 | TFE3      | Homo sapiens transcription factor binding to IGHM enhancer 3 (TFE3)                                   | 0.88 | 1.00 | 1.05 | 0.98 | 0.80 | 0.90 | 1.65 | 0.81 |
| vMF       | ILMN | 1808325 | TM4SF19   | PREDICTED: Homo sapiens transmembrane 4 L six family member 19 (TM4SF19)                              | 0.97 |      |      |      |      |      |      |      |

|     |      |         |              |                                                                         |      |      |      |      |      |      |      |       |
|-----|------|---------|--------------|-------------------------------------------------------------------------|------|------|------|------|------|------|------|-------|
| mDC | ILMN | 1687840 | ABC7         | Homo sapiens ATP-binding cassette, sub-family B (MDR/TAP), memb         | 1.29 | 0.84 | 0.93 | 0.76 | 0.87 | 0.86 | 1.07 | 2.09  |
| mDC | ILMN | 1669633 | ACPI         | Homo sapiens acid phosphatase 1, soluble (ACPI), transcript variant 2   | 1.18 | 0.92 | 1.06 | 0.88 | 0.87 | 0.76 | 0.97 | 2.94  |
| mDC | ILMN | 1733690 | AKAP7        | Homo sapiens A kinase (PRKA) anchor protein 7 (AKAP7), transcript       | 1.25 | 1.00 | 1.00 | 1.52 | 1.17 | 1.11 | 1.37 | 3.90  |
| mDC | ILMN | 2311761 | AP3S1        | Homo sapiens adaptor-related protein complex 3, sigma 1 subunit (AP3    | 1.10 | 0.77 | 0.75 | 0.99 | 0.84 | 0.81 | 1.30 | 2.41  |
| mDC | ILMN | 1752340 | ARF5         | Homo sapiens ADP-ribosylation factor 5 (ARF5)                           | 0.97 | 0.88 | 0.91 | 0.93 | 1.05 | 0.88 | 1.00 | 1.90  |
| mDC | ILMN | 1781010 | ARHGGEF3     | Homo sapiens Rho guanine nucleotide exchange factor (GEF) 3 (ARHG       | 1.08 | 0.86 | 0.58 | 0.80 | 0.69 | 0.80 | 1.10 | 6.73  |
| mDC | ILMN | 1803423 | ARHGGEF6     | Homo sapiens Rac/Cdc42 guanine nucleotide exchange factor (GEF) 6       | 0.97 | 0.82 | 1.22 | 0.42 | 0.52 | 0.59 | 1.07 | 3.79  |
| mDC | ILMN | 1769566 | ATG3         | Homo sapiens ATG3 autophagy related 3 homolog (S. cerevisiae) (ATG      | 0.91 | 1.05 | 0.80 | 0.93 | 0.93 | 0.79 | 0.94 | 2.63  |
| mDC | ILMN | 1660577 | ATP5G2       | Homo sapiens ATP synthase, H+ transporting, mitochondrial F0 compl      | 1.11 | 1.07 | 1.03 | 0.89 | 0.89 | 0.88 | 0.93 | 2.08  |
| mDC | ILMN | 2351638 | BEX4         | Homo sapiens BEX family member 4 (BEX4)                                 | 1.37 | 0.86 | 0.73 | 0.77 | 0.82 | 0.84 | 1.26 | 1.76  |
| mDC | ILMN | 1695354 | BMF          | Homo sapiens Bcl2 modifying factor (BMF), transcript variant 2          | 0.98 | 1.07 | 0.78 | 0.78 | 0.92 | 0.93 | 0.96 | 2.96  |
| mDC | ILMN | 2308338 | BMF          | Homo sapiens Bcl2 modifying factor (BMF), transcript variant 4          | 1.06 | 1.11 | 0.86 | 0.83 | 0.93 | 1.05 | 0.94 | 3.02  |
| mDC | ILMN | 2072140 | BTF3L4       | Homo sapiens basic transcription factor 3-like 4 (BTF3L4)               | 0.87 | 1.43 | 1.24 | 0.75 | 0.86 | 0.88 | 1.24 | 2.61  |
| mDC | ILMN | 1652722 | C14ORF2      | Homo sapiens chromosome 14 open reading frame 2 (C14orf2)               | 1.09 | 0.87 | 0.86 | 0.88 | 0.80 | 0.93 | 1.14 | 3.71  |
| mDC | ILMN | 1680867 | C6ORF61      | PREDICTED: Homo sapiens chromosome 6 open reading frame 61 (C           | 1.26 | 0.88 | 0.88 | 0.86 | 0.91 | 0.94 | 1.08 | 2.30  |
| mDC | ILMN | 1672947 | CAST         | Homo sapiens calpastatin (CAST), transcript variant 11                  | 1.43 | 0.95 | 0.99 | 1.04 | 1.02 | 1.02 | 1.02 | 2.36  |
| mDC | ILMN | 2322806 | CAST         | Homo sapiens calpastatin (CAST), transcript variant 8                   | 1.44 | 0.98 | 0.82 | 0.68 | 0.77 | 0.63 | 0.94 | 3.78  |
| mDC | ILMN | 1654210 | CD1C         | Homo sapiens CD1c molecule (CD1C)                                       | 1.00 | 1.00 | 1.02 | 1.06 | 1.06 | 1.39 | 1.00 | 39.76 |
| mDC | ILMN | 1719433 | CD1D         | Homo sapiens CD1d molecule (CD1D)                                       | 1.01 | 1.01 | 1.01 | 1.00 | 0.99 | 1.08 | 1.11 | 5.24  |
| mDC | ILMN | 1702534 | CD244        | Homo sapiens CD244 molecule, natural killer cell receptor 2B4 (CD24     | 1.01 | 0.99 | 0.97 | 1.13 | 1.08 | 1.06 | 0.96 | 3.27  |
| mDC | ILMN | 1651316 | CD69         | Homo sapiens CD69 molecule (CD69)                                       | 1.02 | 1.03 | 1.00 | 1.00 | 1.00 | 1.00 | 1.00 | 4.22  |
| mDC | ILMN | 1786016 | CHD1L        | Homo sapiens chromodomain helicase DNA binding protein 1-like (Ch       | 1.21 | 1.00 | 0.81 | 0.76 | 0.82 | 0.77 | 0.89 | 2.55  |
| mDC | ILMN | 1779401 | CHP          | Homo sapiens calmodulin binding protein P22 (CHP)                       | 1.14 | 0.94 | 0.78 | 1.19 | 0.91 | 0.78 | 1.04 | 2.10  |
| mDC | ILMN | 1722390 | CHRA1        | Homo sapiens chromatin accessibility complex 1 (CHRA1)                  | 0.98 | 1.13 | 1.03 | 1.23 | 1.07 | 1.03 | 1.29 | 5.78  |
| mDC | ILMN | 1777378 | COMMD6       | Homo sapiens COMM domain containing 6 (COMMD6), transcript va           | 1.08 | 1.00 | 0.98 | 1.03 | 1.08 | 1.02 | 1.03 | 1.92  |
| mDC | ILMN | 3237665 | COX7A2L      | Homo sapiens cytochrome c oxidase subunit VIIa polypeptide 2 like (C    | 1.11 | 1.02 | 0.88 | 1.00 | 0.79 | 0.77 | 0.94 | 1.71  |
| mDC | ILMN | 1706521 | CSNK1G2      | Homo sapiens casein kinase 1, gamma 2 (CSNK1G2)                         | 1.05 | 0.95 | 0.89 | 1.05 | 1.01 | 0.95 | 0.85 | 1.73  |
| mDC | ILMN | 2337928 | CXCR5        | Homo sapiens chemokine (C-X-C motif) receptor 5 (CXCR5), transcr        | 1.02 | 0.99 | 1.05 | 1.18 | 1.11 | 1.22 | 1.22 | 2.12  |
| mDC | ILMN | 1775508 | CYLD         | Homo sapiens cylindromatosis (turban tumor syndrome) (CYLD)             | 0.79 | 1.55 | 1.01 | 1.08 | 0.88 | 0.79 | 3.41 |       |
| mDC | ILMN | 1746257 | DAZAP1       | Homo sapiens DAZ associated protein 1 (DAZAP1), transcript variant      | 1.23 | 1.09 | 0.75 | 1.01 | 0.86 | 0.85 | 0.85 | 1.55  |
| mDC | ILMN | 1718988 | DAZAP2       | Homo sapiens DAZ associated protein 2 (DAZAP2)                          | 1.02 | 0.92 | 1.07 | 0.83 | 0.71 | 0.73 | 1.16 | 1.58  |
| mDC | ILMN | 1802456 | DCTD         | Homo sapiens dCMP deaminase (DCTD), transcript variant 2                | 0.93 | 0.98 | 0.82 | 0.81 | 0.71 | 0.71 | 1.38 | 1.70  |
| mDC | ILMN | 1744059 | DCTN6        | Homo sapiens dynactin 6 (DCTN6)                                         | 1.02 | 1.01 | 0.69 | 0.98 | 0.80 | 0.85 | 0.98 | 1.76  |
| mDC | ILMN | 1735461 | DDX21        | Homo sapiens DEAD (Asp-Glu-Ala-Asp) box polypeptide 21 (DDX21)          | 1.45 | 1.14 | 0.71 | 0.78 | 0.68 | 0.71 | 0.98 | 6.37  |
| mDC | ILMN | 1791896 | EBAG9        | Homo sapiens estrogen receptor binding site associated, antigen, 9 (EB  | 1.21 | 0.78 | 0.80 | 0.84 | 0.80 | 0.75 | 1.14 | 2.66  |
| mDC | ILMN | 1665717 | EIF2S3       | Homo sapiens eukaryotic translation initiation factor 2, subunit 3 (gam | 1.21 | 0.98 | 0.84 | 0.87 | 0.63 | 0.69 | 1.14 | 2.89  |
| mDC | ILMN | 2192693 | EIF3M        | Homo sapiens eukaryotic translation initiation factor 3, subunit M (EIF | 1.16 | 0.94 | 0.77 | 1.07 | 1.00 | 0.87 | 0.86 | 2.63  |
| mDC | ILMN | 2174369 | ELOVL5       | Homo sapiens ELOVL family member 5, elongation of long chain fatty      | 1.63 | 1.24 | 1.05 | 0.92 | 0.98 | 0.91 | 1.03 | 8.80  |
| mDC | ILMN | 1713835 | ENHO         | Homo sapiens energy homeostasis associated (ENHO)                       | 1.05 | 1.03 | 0.97 | 1.18 | 1.08 | 0.97 | 0.95 | 3.77  |
| mDC | ILMN | 2323048 | ERP29        | Homo sapiens endoplasmic reticulum protein 29 (ERP29), transcript va    | 0.94 | 0.85 | 0.74 | 1.00 | 0.87 | 1.10 | 1.18 | 2.33  |
| mDC | ILMN | 1786789 | FAM102B      | Homo sapiens family with sequence similarity 102, member B (FAM10       | 1.53 | 1.01 | 1.33 | 0.75 | 0.94 | 0.69 | 1.15 | 3.38  |
| mDC | ILMN | 1778611 | GBAS         | Homo sapiens glioblastoma amplified sequence (GBAS)                     | 1.50 | 0.81 | 0.84 | 0.85 | 0.82 | 0.89 | 1.44 | 3.65  |
| mDC | ILMN | 2384056 | GPER         | Homo sapiens G protein-coupled estrogen receptor 1 (GPER), transcr      | 1.17 | 1.46 | 1.06 | 1.11 | 1.07 | 1.09 | 1.10 | 3.08  |
| mDC | ILMN | 1684227 | GPR146       | Homo sapiens G protein-coupled receptor 146 (GPR146)                    | 0.97 | 1.11 | 1.07 | 1.12 | 1.11 | 1.04 | 1.04 | 1.69  |
| mDC | ILMN | 2335718 | HNRNPAB      | Homo sapiens heterogeneous nuclear ribonucleoprotein A/B (HNRNPAB       | 1.00 | 1.05 | 0.77 | 1.19 | 0.77 | 0.96 | 1.12 | 1.65  |
| mDC | ILMN | 1739582 | HOXA9        | Homo sapiens homeobox A9 (HOXA9)                                        | 1.01 | 1.07 | 1.17 | 1.15 | 1.19 | 1.13 | 1.08 | 3.13  |
| mDC | ILMN | 1881960 | HS.444785    | full-length cDNA clone CS0DF032YA11 of Fetal brain of Homo sapien       | 1.00 | 1.00 | 1.00 | 1.00 | 1.03 | 1.00 | 1.06 | 3.88  |
| mDC | ILMN | 1846922 | HS.568741    | TC125227 Human breast cancer tissue, large insert, pCMV expression      | 1.08 | 0.94 | 0.91 | 1.22 | 1.17 | 1.23 | 1.04 | 2.58  |
| mDC | ILMN | 1793474 | INSIG1       | Homo sapiens insulin induced gene 1 (INSIG1), transcript variant 2      | 0.81 | 1.19 | 1.58 | 0.93 | 0.97 | 1.02 | 0.95 | 3.95  |
| mDC | ILMN | 3251605 | KLHL28       | Homo sapiens kelch-like 28 (Drosophila) (KLHL28)                        | 0.75 | 1.08 | 1.06 | 0.77 | 1.11 | 0.86 | 1.06 | 2.65  |
| mDC | ILMN | 1728132 | LDHB         | Homo sapiens lactate dehydrogenase B (LDHB)                             | 0.87 | 0.84 | 0.80 | 0.84 | 0.98 | 0.99 | 1.04 | 4.14  |
| mDC | ILMN | 1687306 | LGALS2       | Homo sapiens lectin, galactoside-binding, soluble, 2 (LGALS2)           | 0.99 | 1.00 | 1.00 | 1.12 | 1.24 | 1.17 | 1.04 | 4.75  |
| mDC | ILMN | 3266666 | LOC100128196 | PREDICTED: Homo sapiens misc RNA (LOC100128196), miscRNA                | 1.50 | 0.96 | 0.87 | 1.23 | 1.07 | 0.83 | 0.83 | 3.17  |
| mDC | ILMN | 3256674 | LOC100128485 | PREDICTED: Homo sapiens similar to conserved hypothetical protein       | 1.23 | 1.00 | 1.11 | 1.11 | 1.07 | 1.00 | 1.00 | 2.11  |
| mDC | ILMN | 3177271 | LOC100129585 | PREDICTED: Homo sapiens similar to hCG2011544 (LOC100129585)            | 1.49 | 0.83 | 0.84 | 1.05 | 0.79 | 0.78 | 1.04 | 2.32  |
| mDC | ILMN | 3240986 | LOC100134584 | PREDICTED: Homo sapiens hypothetical protein LOC100134584 (LOC          | 0.94 | 1.19 | 1.03 | 0.91 | 1.17 | 1.22 | 1.05 | 2.64  |
| mDC | ILMN | 3278506 | LOC148430    | PREDICTED: Homo sapiens misc RNA (LOC148430), miscRNA.                  | 1.02 | 1.11 | 0.81 | 1.00 | 1.14 | 0.97 | 0.89 | 1.73  |
| mDC | ILMN | 3199489 | LOC282997    | PREDICTED: Homo sapiens misc RNA (LOC282997), miscRNA.                  | 0.99 | 1.06 | 1.02 | 1.08 | 1.07 | 1.08 | 1.11 | 1.74  |
| mDC | ILMN | 1695034 | LOC642817    | PREDICTED: Homo sapiens hypothetical LOC642817 (LOC642817)              | 1.13 | 0.93 | 0.97 | 0.94 | 0.94 | 0.95 | 0.89 | 1.99  |
| mDC | ILMN | 1669424 | LOC646531    | PREDICTED: Homo sapiens similar to nuclease sensitive element bind      | 0.86 | 0.93 | 0.82 | 1.02 | 0.87 | 0.92 | 1.15 | 2.04  |
| mDC | ILMN | 1725170 | LOC650557    | PREDICTED: Homo sapiens similar to HLA class II histocompatibility      | 1.37 | 1.91 | 1.37 | 0.62 | 0.86 | 0.74 | 0.91 | 3.92  |
| mDC | ILMN | 1685378 | LOC728973    | PREDICTED: Homo sapiens similar to 40S ribosomal protein S7 (S8)        | 1.21 | 1.01 | 1.07 | 0.91 | 0.96 | 0.90 | 1.15 | 1.79  |
| mDC | ILMN | 3229467 | LOC729217    | PREDICTED: Homo sapiens misc RNA (LOC729217), miscRNA.                  | 1.10 | 1.01 | 1.02 | 1.27 | 1.07 | 1.19 | 1.06 | 3.62  |
| mDC | ILMN | 3227529 | LOC729236    | PREDICTED: Homo sapiens misc RNA (LOC729236), miscRNA.                  | 1.11 | 1.12 | 1.00 | 1.15 | 1.20 | 0.99 | 0.99 | 1.91  |
| mDC | ILMN | 1665943 | MAP4K1       | Homo sapiens mitogen-activated protein kinase kinase kinase 1           | 1.03 | 1.02 | 1.01 | 1.01 | 0.83 | 1.10 | 1.09 | 5.79  |
| mDC | ILMN | 2365111 | MAP4K1       | Homo sapiens mitogen-activated protein kinase kinase kinase 1           | 1.02 | 1.01 | 1.02 | 1.02 | 0.87 | 1.09 | 1.06 | 5.50  |
| mDC | ILMN | 1786189 | MKI67IP      | Homo sapiens MKI67 (FHA domain) interacting nucleolar phosphopro        | 1.05 | 0.66 | 0.86 | 0.81 | 0.67 | 0.72 | 0.96 | 2.50  |
| mDC | ILMN | 2148796 | MND1         | Homo sapiens meiotic nuclear divisions 1 homolog (S. cerevisiae) (MN    | 1.00 | 1.00 | 1.00 | 1.00 | 1.00 | 1.00 | 1.00 | 2.58  |
| mDC | ILMN | 1676159 | MST4         | Homo sapiens serine/threonine protein kinase MST4 (MST4), transcr       | 1.03 | 1.51 | 1.46 | 0.75 | 0.87 | 0.74 | 0.90 | 4.39  |
| mDC | ILMN | 1737738 | NDUFA12      | Homo sapiens NADH dehydrogenase (ubiquinone) 1 alpha subcomplex         | 1.29 | 0.71 | 0.70 | 0.90 | 0.89 | 1.03 | 1.21 | 2.54  |
| mDC | ILMN | 1807397 | NDUFB5       | Homo sapiens NADH dehydrogenase (ubiquinone) 1 beta subcomplex          | 1.10 | 0.82 | 0.77 | 0.95 | 0.86 | 0.78 | 1.01 | 1.70  |
| mDC | ILMN | 1720344 | NIP2A        | Homo sapiens non-imprinted in Prader-Willi/Angelman syndrome 2 (N       | 0.91 | 1.03 | 0.83 | 0.90 | 0.76 | 0.90 | 1.21 | 2.57  |
| mDC | ILMN | 2352121 | NTSC3        | Homo sapiens 5'-nucleotidase, cytosolic III (NTSC3), transcript variant | 1.01 | 1.29 | 1.16 | 0.85 | 0.85 | 0.85 | 0.90 | 5.87  |
| mDC | ILMN | 1784467 | NUP210       | Homo sapiens nucleoporin 210kDa (NUP210)                                | 0.98 | 1.02 | 0.94 | 1.14 | 1.14 | 1.05 | 1.10 | 3.05  |
| mDC | ILMN | 1771835 | NUP54        | Homo sapiens nucleoporin 54kDa (NUP54)                                  | 1.21 | 1.22 | 0.99 | 1.02 | 1.02 | 1.01 | 1.01 | 3.32  |
| mDC | ILMN | 1731851 | OXA1L        | Homo sapiens oxidase (cytochrome c) assembly 1-like (OXA1L)             | 1.06 | 0.97 | 0.89 | 0.99 | 0.95 | 0.91 | 1.03 | 3.21  |
| mDC | ILMN | 1710571 | PAPD5        | Homo sapiens PAP associated domain containing 5 (PAPD5), transcrip      | 0.57 | 0.96 | 0.78 | 1.39 | 1.27 | 1.22 | 1.13 | 4.63  |
| mDC | ILMN | 1780132 | PEL12        | Homo sapiens pellino homolog 2 (Drosophila) (PEL12)                     | 0.85 | 0.90 | 1.09 | 1.14 | 1.13 | 1.17 | 1.36 | 1.93  |
| mDC | ILMN | 1733666 | PLDN         | Homo sapiens pallidin homolog (mouse) (PLDN)                            | 1.27 | 1.12 | 1.03 | 0.99 | 0.98 | 0.96 | 0.97 | 2.18  |
| mDC | ILMN | 1767894 | POLB         | Homo sapiens polymerase (DNA directed), beta (POLB)                     | 0.89 | 0.89 | 0.83 | 1.06 | 0.90 | 0.71 | 1.12 | 3.38  |
| mDC | ILMN | 1769091 | PRCP         | Homo sapiens prolylcarboxypeptidase (angiotensinase C) (PRCP), tran     | 1.06 | 0.86 | 0.76 | 0.95 | 0.74 | 0.84 | 1.09 | 2.55  |
| mDC | ILMN | 2367215 | PRCP         | Homo sapiens prolylcarboxypeptidase (angiotensinase C) (PRCP), tran     | 1.24 | 0.90 | 0.74 | 0.92 | 0.86 | 0.82 | 1.15 | 2.81  |
| mDC | ILMN | 1741244 | PRR8         | Homo sapiens proline rich 8 (PRR8)                                      | 1.05 | 1.00 | 1.21 | 1.12 | 1.04 | 0.91 | 1.23 | 2.84  |
| mDC | ILMN | 1795927 | PSPC1        | Homo sapiens paraspeckle component 1 (PSPC1), transcript variant alt    | 1.12 | 1.19 | 0.99 | 1.14 | 0.90 | 0.90 | 0.96 | 2.89  |
| mDC | ILMN | 1781454 | RAE1         | Homo sapiens RAE1 RNA export 1 homolog (S. pombe) (RAE1), trans         | 0.87 | 1.22 | 0.99 | 0.75 | 0.71 | 0.88 | 0.95 | 1.60  |
| mDC | ILMN | 1745282 | RAGE         | Homo sapiens renal tumor antigen (RAGE)                                 | 1.25 | 0.93 | 1.01 | 1.63 | 1.13 | 1.21 | 1.22 | 2.30  |
| mDC | ILMN | 2375319 | RASGRP2      | Homo sapiens RAS guanyl releasing protein 2 (calcium and DAG-regu       | 1.17 | 0.95 | 0.84 | 0.97 | 1.03 | 1.00 | 0.91 | 2.14  |
| mDC | ILMN | 1770053 | RBBP7        | Homo sapiens retinoblastoma binding protein 7 (RBBP7)                   | 1.33 | 1.20 | 0.80 | 0.96 | 0.89 | 0.90 | 0.88 | 2.33  |
| mDC | ILMN | 1720124 | RCC2         | Homo sapiens regulator of chromosome condensation 2 (RCC2)              | 0.96 | 1.06 | 0.72 | 0.93 | 0.83 | 0.88 | 1.08 | 4.19  |
| mDC | ILMN | 1751886 | REC8         | Homo sapiens REC8 homolog (yeast) (REC8), transcript variant 1          | 1.00 | 0.96 | 0.97 | 0.95 | 0.93 | 1.04 | 1.25 | 4.20  |
| mDC | ILMN | 1748614 | RELT         | Homo sapiens RELT tumor necrosis factor receptor (RELT), transcript     | 0.82 | 1.41 | 1.31 | 0.71 | 0.78 | 0.80 | 1.12 | 3.33  |
| mDC | ILMN | 2197365 | RGS2         | Homo sapiens regulator of G-protein signalling 2, 24kDa (RGS2)          | 1.13 | 1.18 | 0.97 | 0.97 | 0.89 | 0.90 | 0.79 | 3.02  |
| mDC | ILMN | 2079386 | RPL22        | Homo sapiens ribosomal protein L22 (RPL22)                              | 1.09 | 1.14 | 0.97 |      |      |      |      |       |

|     |              |           |                                                                          |      |      |      |      |      |      |      |      |
|-----|--------------|-----------|--------------------------------------------------------------------------|------|------|------|------|------|------|------|------|
| mDC | ILMN_1653429 | SLC35A3   | Homo sapiens solute carrier family 35 (UDP-N-acetylglucosamine (U        | 1.32 | 1.06 | 1.18 | 1.23 | 1.07 | 1.07 | 1.13 | 3.18 |
| mDC | ILMN_1720373 | SLC7A5    | Homo sapiens solute carrier family 7 (cationic amino acid transporter, s | 0.77 | 1.14 | 0.94 | 1.39 | 1.00 | 1.03 | 1.04 | 4.67 |
| mDC | ILMN_1706553 | SMG7      | Homo sapiens Smg-7 homolog, nonsense mediated mRNA decay facto           | 0.79 | 1.05 | 0.91 | 1.04 | 0.92 | 0.97 | 1.12 | 3.22 |
| mDC | ILMN_1788251 | SNN       | Homo sapiens stannin (SNN)                                               | 1.08 | 0.99 | 0.67 | 1.06 | 1.09 | 1.06 | 0.84 | 1.63 |
| mDC | ILMN_1799381 | SNORD14A  | Homo sapiens small nucleolar RNA, C/D box 14A (SNORD14A), sma            | 0.91 | 1.34 | 1.37 | 0.89 | 0.77 | 0.83 | 0.86 | 2.30 |
| mDC | ILMN_2400644 | SRGAP3    | Homo sapiens SLIT-ROBO Rho GTPase activating protein 3 (SRGAP            | 1.35 | 0.99 | 1.15 | 1.41 | 1.25 | 1.21 | 1.25 | 4.81 |
| mDC | ILMN_1660186 | SYF2      | Homo sapiens SYF2 homolog, RNA splicing factor (S. cerevisiae) (SY       | 0.99 | 0.91 | 0.91 | 1.01 | 0.98 | 0.94 | 0.93 | 1.81 |
| mDC | ILMN_1676408 | TAGAP     | Homo sapiens T-cell activation RhoGTPase activating protein (TAGAP       | 0.98 | 1.02 | 1.01 | 1.11 | 1.12 | 1.17 | 1.12 | 2.92 |
| mDC | ILMN_2333774 | TAGAP     | Homo sapiens T-cell activation RhoGTPase activating protein (TAGAP       | 0.94 | 0.98 | 1.07 | 1.15 | 1.15 | 1.18 | 1.21 | 3.55 |
| mDC | ILMN_1742450 | TAPBP     | Homo sapiens TAP binding protein (tapasin) (TAPBP), transcript varia     | 1.03 | 1.00 | 0.78 | 1.01 | 1.12 | 0.98 | 0.96 | 2.02 |
| mDC | ILMN_1787511 | THUMPD2   | Homo sapiens THUMP domain containing 2 (THUMPD2)                         | 1.13 | 0.98 | 0.79 | 0.95 | 0.86 | 0.94 | 1.03 | 4.28 |
| mDC | ILMN_2092756 | TMEM109   | Homo sapiens transmembrane protein 109 (TMEM109)                         | 1.22 | 0.97 | 0.63 | 1.04 | 0.70 | 0.78 | 0.82 | 1.78 |
| mDC | ILMN_1714623 | TOMM22    | Homo sapiens translocase of outer mitochondrial membrane 22 homolo       | 1.25 | 0.61 | 0.67 | 0.87 | 0.87 | 0.80 | 0.78 | 2.91 |
| mDC | ILMN_2065606 | TOMM40L   | Homo sapiens translocase of outer mitochondrial membrane 40 homolo       | 0.96 | 0.99 | 1.17 | 1.05 | 0.98 | 1.09 | 1.27 | 1.74 |
| mDC | ILMN_2192316 | TOP1      | Homo sapiens topoisomerase (DNA) I (TOP1)                                | 0.88 | 1.03 | 0.96 | 0.76 | 0.86 | 0.82 | 0.93 | 2.21 |
| mDC | ILMN_2293374 | TOP1MT    | Homo sapiens topoisomerase (DNA) I, mitochondrial (TOP1MT), nucl         | 1.00 | 1.00 | 1.00 | 1.02 | 1.00 | 1.06 | 1.01 | 2.56 |
| mDC | ILMN_1684929 | TOPBP1    | Homo sapiens topoisomerase (DNA) II binding protein 1 (TOPBP1)           | 1.48 | 0.79 | 0.69 | 0.81 | 0.81 | 0.78 | 1.06 | 1.70 |
| mDC | ILMN_2351930 | TRIM33    | Homo sapiens tripartite motif-containing 33 (TRIM33), transcript varia   | 0.97 | 1.44 | 0.58 | 0.72 | 0.64 | 0.70 | 1.01 | 1.79 |
| mDC | ILMN_1718621 | TSPAN32   | Homo sapiens tetraspanin 32 (TSPAN32), transcript variant 2              | 0.99 | 0.99 | 0.99 | 1.04 | 1.05 | 1.06 | 1.03 | 4.08 |
| mDC | ILMN_1810729 | UBL3      | Homo sapiens ubiquitin-like 3 (UBL3)                                     | 0.61 | 1.27 | 0.80 | 0.75 | 0.53 | 0.62 | 0.87 | 1.86 |
| mDC | ILMN_1799601 | UHRF1BP1L | Homo sapiens UHRF1 binding protein 1-like (UHRF1BP1L), transcrip         | 1.20 | 1.19 | 1.18 | 0.92 | 0.88 | 0.85 | 1.09 | 6.77 |
| mDC | ILMN_1718853 | UQCRC2    | Homo sapiens ubiquinol-cytochrome c reductase core protein II (UQC       | 1.20 | 0.83 | 0.80 | 0.88 | 0.84 | 0.86 | 1.02 | 1.86 |
| mDC | ILMN_1659703 | WWP2      | Homo sapiens WW domain containing E3 ubiquitin protein ligase 2 (W       | 0.59 | 1.31 | 0.93 | 0.73 | 0.88 | 0.62 | 1.19 | 3.55 |
