# Supplementary material for: Transcriptional fingerprints of antigen-presenting cell subsets in the human vaginal mucosa and skin reflect tissue-specific immune microenvironments
Source: PubMed Central journal article supplement (PMC4268898; doi:10.1186/s13073-014-0098-y), 2014-11-25
Supplement: 13073_2014_98_MOESM6_ESM.pdf [file 13073_2014_98_MOESM6_ESM.pdf]

a

## vCD14- DC vs. vMΦ

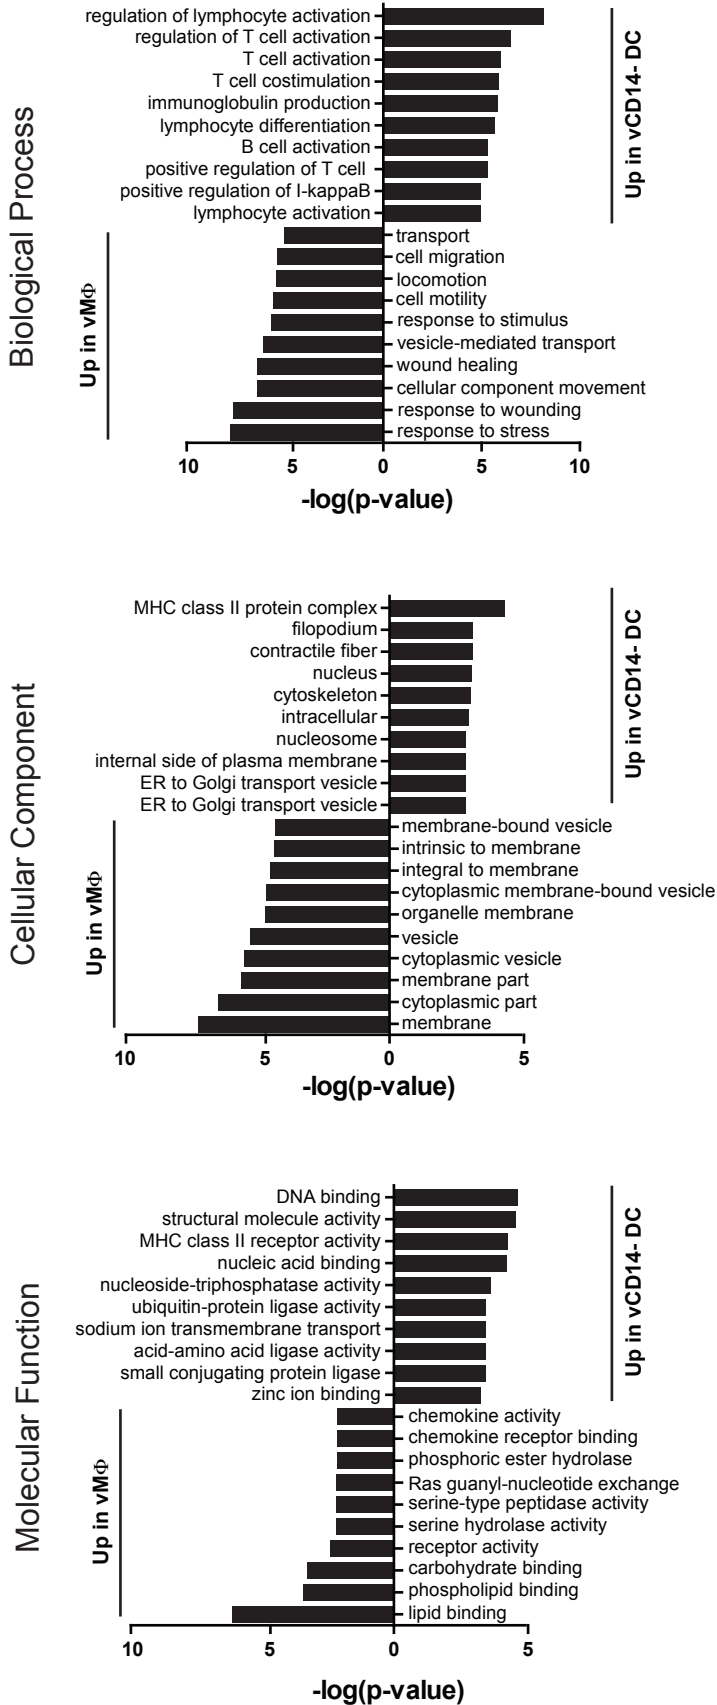

b

## vLC vs. vMΦ

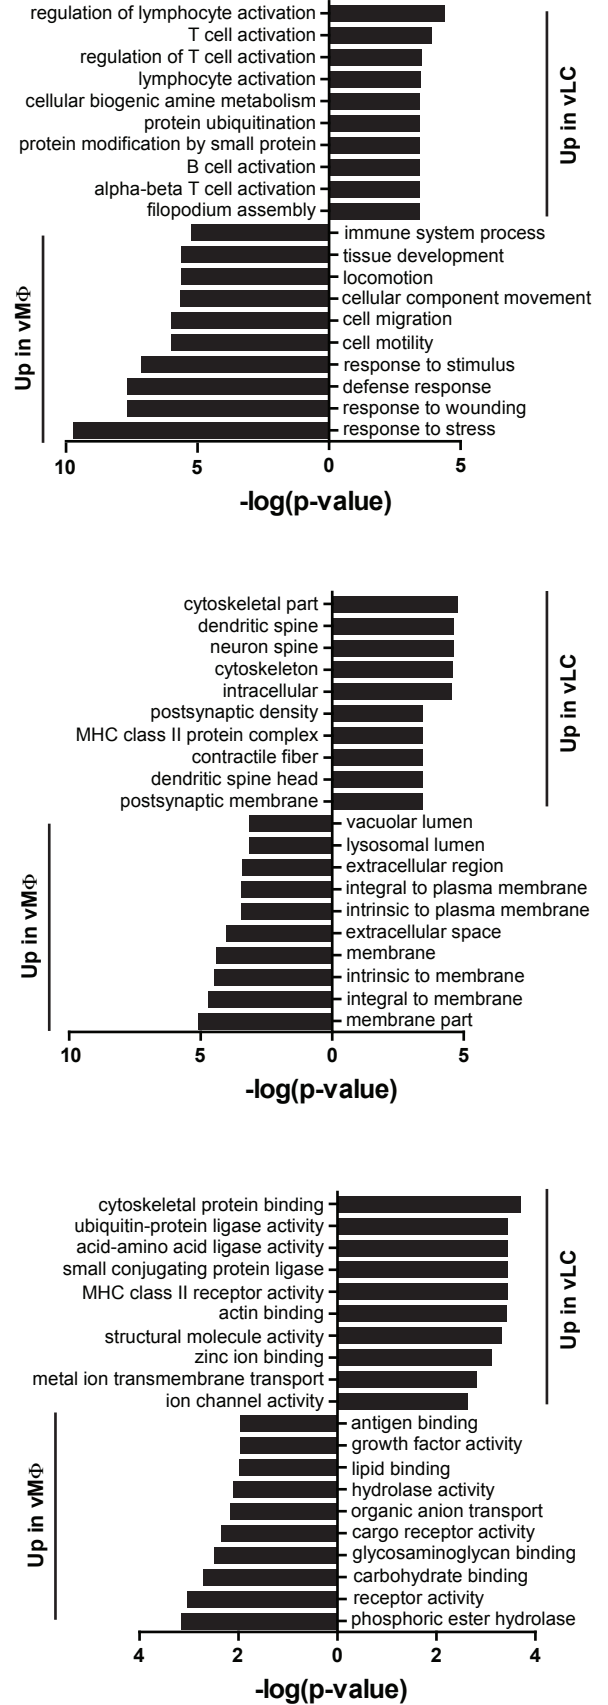

**Figure S3: GO enrichment analysis for transcripts significantly differently expressed between vCD14- DC and vMΦ (a) or vLC and vMΦ (b).** Biological process, cellular component and molecular function classifications are represented separately.
