# Supplementary material for: Transcriptional fingerprints of antigen-presenting cell subsets in the human vaginal mucosa and skin reflect tissue-specific immune microenvironments
Source: PubMed Central journal article supplement (PMC4268898; doi:10.1186/s13073-014-0098-y), 2014-11-25
Supplement: 13073_2014_98_MOESM8_ESM.pdf [file 13073_2014_98_MOESM8_ESM.pdf]

**a**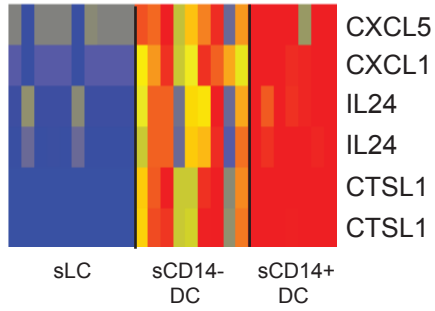**b**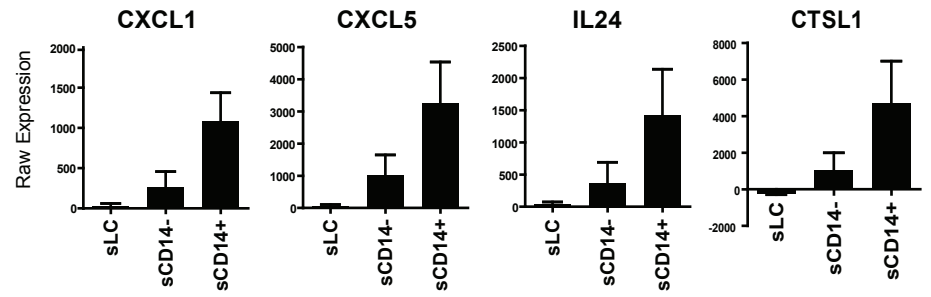

**Figure S5: 6 transcripts representing 4 genes differentially expressed between the 3 skin DC subsets. a.** Hierarchical clustering of the 6 transcripts differentially expressed in the 3 skin DC subsets. **b.** Bar charts representing the mean raw expression value for 4 of the 6 transcripts. Bars represent the standard deviation.
