# Supplementary material for: Transcriptional fingerprints of antigen-presenting cell subsets in the human vaginal mucosa and skin reflect tissue-specific immune microenvironments
Source: PubMed Central journal article supplement (PMC4268898; doi:10.1186/s13073-014-0098-y), 2014-11-25
Supplement: 13073_2014_98_MOESM11_ESM.pdf [file 13073_2014_98_MOESM11_ESM.pdf]

Up in sLC vs.  
vLC (58)

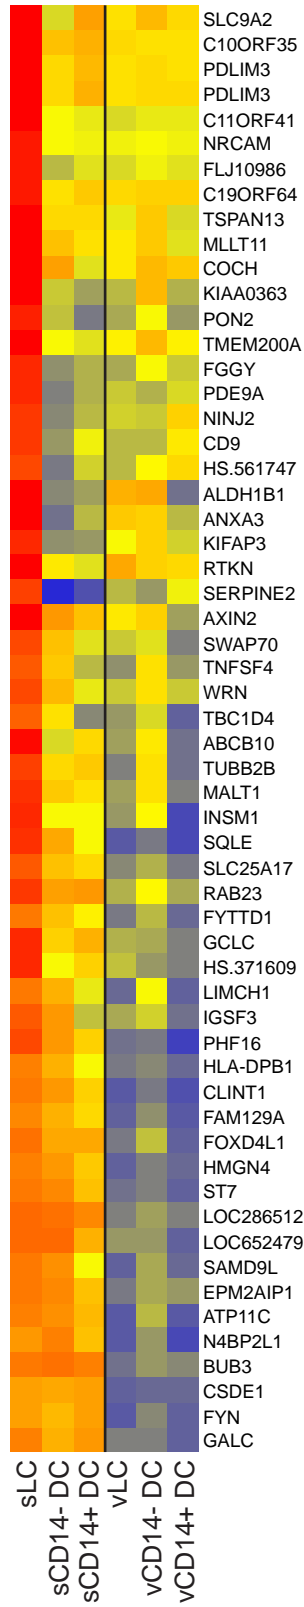

Up in vLC vs. sLC (107)

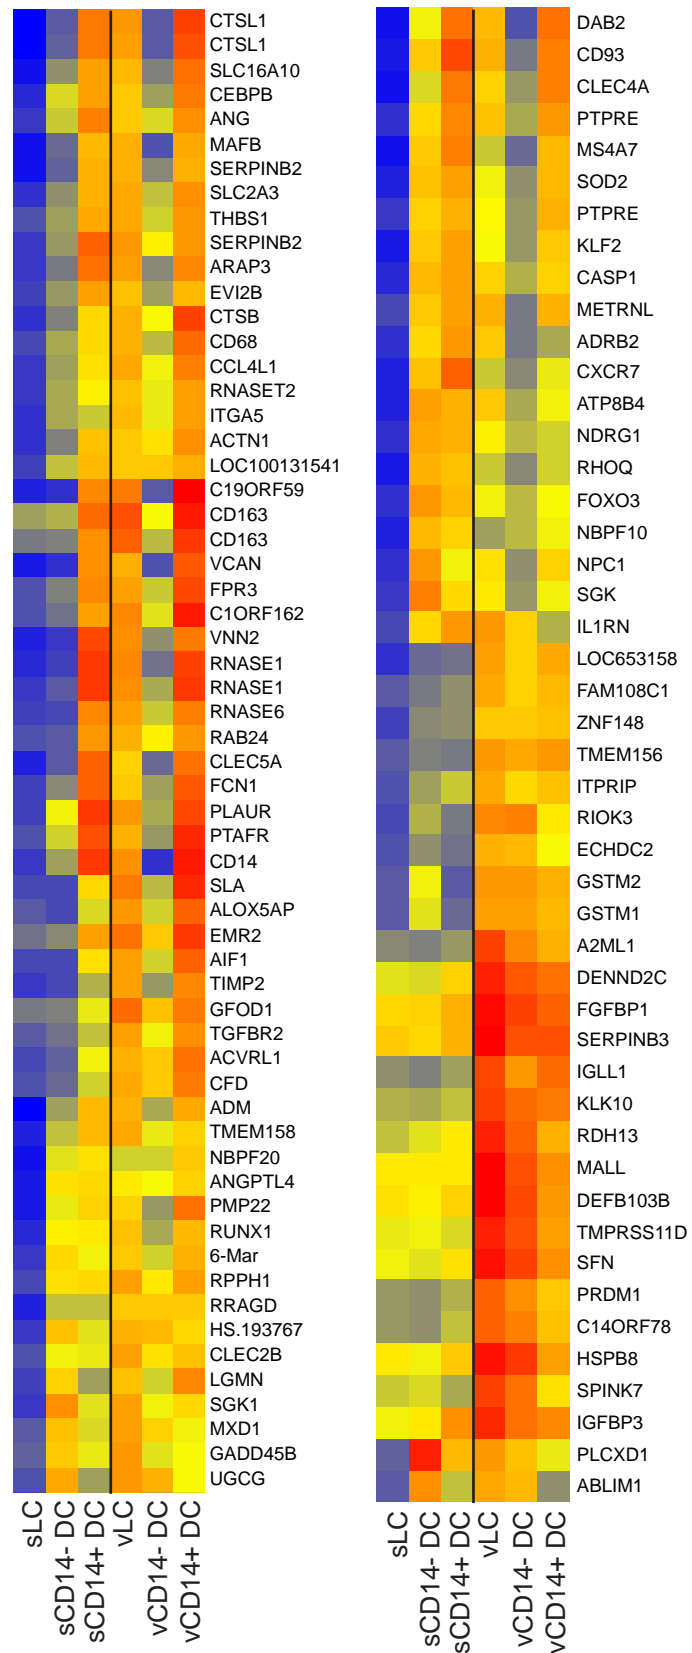

**Figure S8 - Hierarchical clustering of the 165 transcripts differentially expressed between sLC and vLC.**

Left panel: 58 transcript-over-expressed in sLC. Right panel: 107 transcripts over-expressed in vLC. Data are normalized to the median of all samples.
