# Supplementary material for: Transcriptional fingerprints of antigen-presenting cell subsets in the human vaginal mucosa and skin reflect tissue-specific immune microenvironments
Source: PubMed Central journal article supplement (PMC4268898; doi:10.1186/s13073-014-0098-y), 2014-11-25
Supplement: 13073_2014_98_MOESM12_ESM.pdf [file 13073_2014_98_MOESM12_ESM.pdf]

Up in sCD14- vs. vCD14- (127)

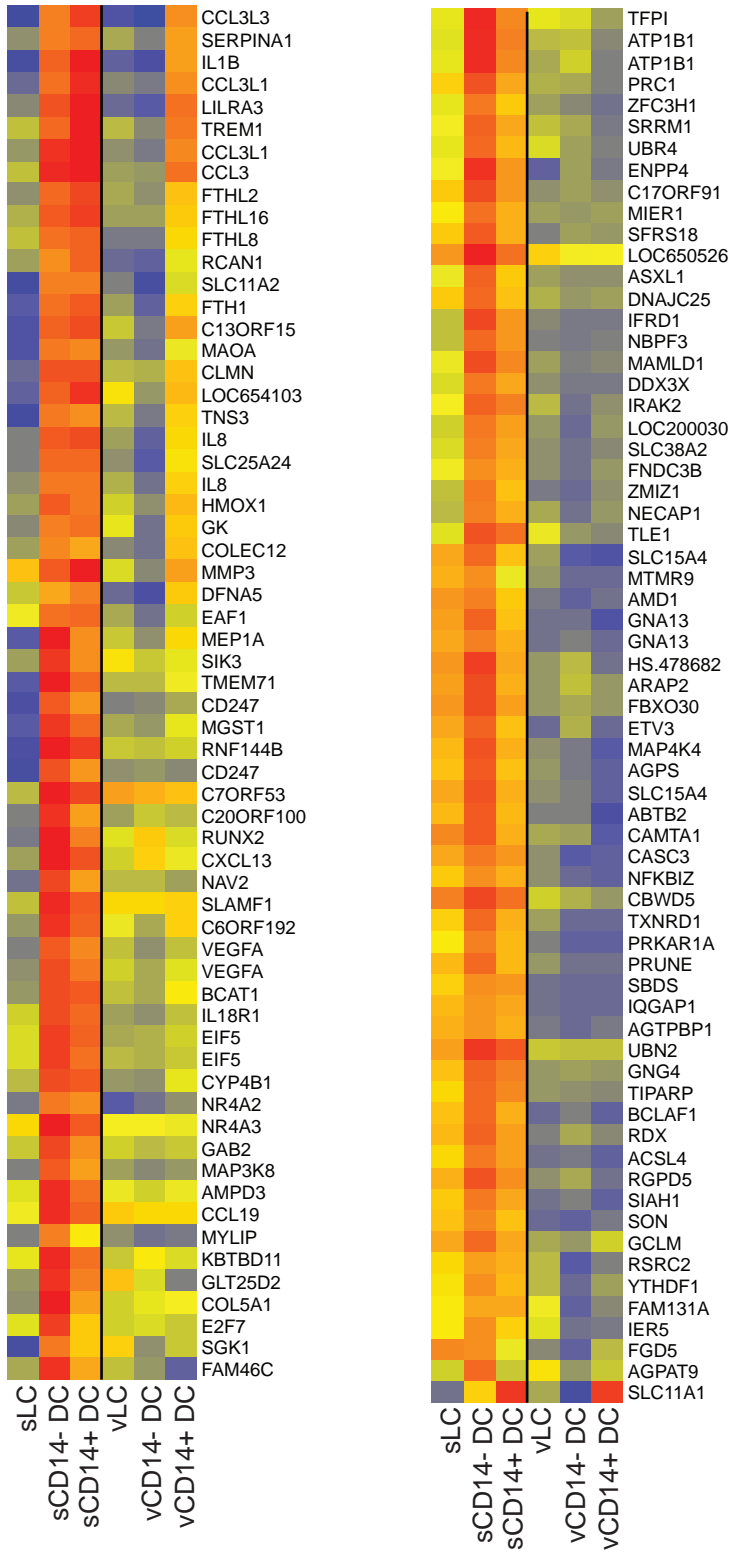

Up in vCD14- vs. sCD14- (25)

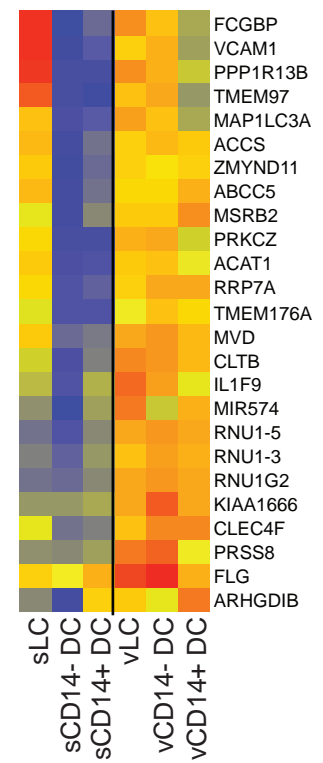

**Figure S9 - Hierarchical clustering of the 152 transcripts differentially expressed between sCD14- and vCD14- DC.** Left panel: 127 transcripts over-expressed in sCD14- DC. Right panel: 25 transcripts over-expressed in vCD14- DC. Data are normalized to the median of all samples.
