# Supplementary material for: Transcriptional fingerprints of antigen-presenting cell subsets in the human vaginal mucosa and skin reflect tissue-specific immune microenvironments
Source: PubMed Central journal article supplement (PMC4268898; doi:10.1186/s13073-014-0098-y), 2014-11-25
Supplement: 13073_2014_98_MOESM13_ESM.pdf [file 13073_2014_98_MOESM13_ESM.pdf]

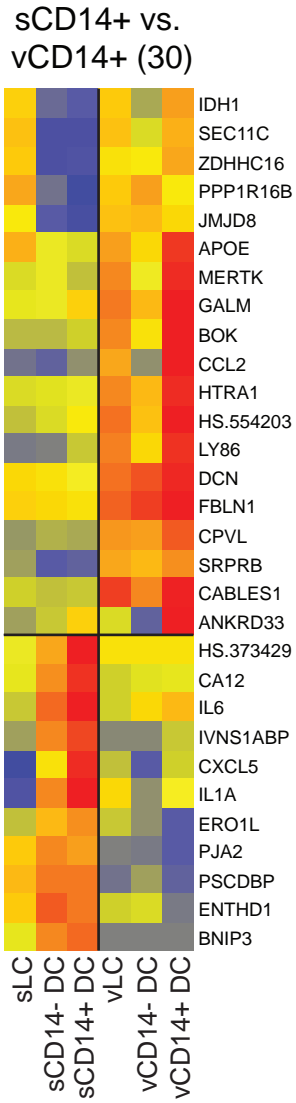

**Figure S10 - Hierarchical clustering of the 30 transcripts differentially expressed between sCD14+ and vCD14+ DC.**  
Data are normalized to the median of all samples.
