# Supplementary material for: Transcriptional fingerprints of antigen-presenting cell subsets in the human vaginal mucosa and skin reflect tissue-specific immune microenvironments
Source: PubMed Central journal article supplement (PMC4268898; doi:10.1186/s13073-014-0098-y), 2014-11-25
Supplement: 13073_2014_98_MOESM16_ESM.pdf [file 13073_2014_98_MOESM16_ESM.pdf]

|              |      |                                          |    |    |    |    |    |    |    |    |
|--------------|------|------------------------------------------|----|----|----|----|----|----|----|----|
| ILMN_1772387 | TLR2 | Homo sapiens toll-like receptor 2 (TLR2) | -  | +  | +  | +  | +  | +  | +  | +  |
| ILMN_2155708 | TLR3 | Homo sapiens toll-like receptor 3 (TLR3) | ND | ND | ND | ND | ND | ND | ND | ND |
| ILMN_1689578 | TLR3 | Homo sapiens toll-like receptor 3 (TLR3) | -  | -  | -  | +  | +  | +  | +  | +  |
| ILMN_1706217 | TLR4 | Homo sapiens toll-like receptor 4 (TLR4) | -  | +  | -  | +  | +  | +  | +  | +  |
| ILMN_1722981 | TLR5 | Homo sapiens toll-like receptor 5 (TLR5) | -  | +  | -  | +  | +  | +  | +  | +  |
| ILMN_1749287 | TLR6 | Homo sapiens toll-like receptor 6 (TLR6) | +  | +  | +  | +  | +  | +  | +  | +  |
| ILMN_1654560 | TLR6 | Homo sapiens toll-like receptor 6 (TLR6) | +  | +  | +  | +  | +  | +  | +  | +  |
| ILMN_1677827 | TLR7 | Homo sapiens toll-like receptor 7 (TLR7) | -  | -  | -  | +  | +  | +  | +  | +  |
| ILMN_1705047 | TLR8 | Homo sapiens toll-like receptor 8 (TLR8) | +  | +  | +  | +  | +  | +  | +  | +  |
| ILMN_1657892 | TLR8 | Homo sapiens toll-like receptor 8 (TLR8) | -  | +  | +  | +  | +  | +  | +  | +  |
| ILMN_1679798 | TLR9 | Homo sapiens toll-like receptor 9 (TLR9) | ND | ND | ND | ND | ND | ND | ND | ND |

ND: not detected; -: <10; +: <100; ++: <500; +++: >= 500
