# Supplementary material for: Transcriptional fingerprints of antigen-presenting cell subsets in the human vaginal mucosa and skin reflect tissue-specific immune microenvironments
Source: PubMed Central journal article supplement (PMC4268898; doi:10.1186/s13073-014-0098-y), 2014-11-25
Supplement: 13073_2014_98_MOESM18_ESM.pdf [file 13073_2014_98_MOESM18_ESM.pdf]

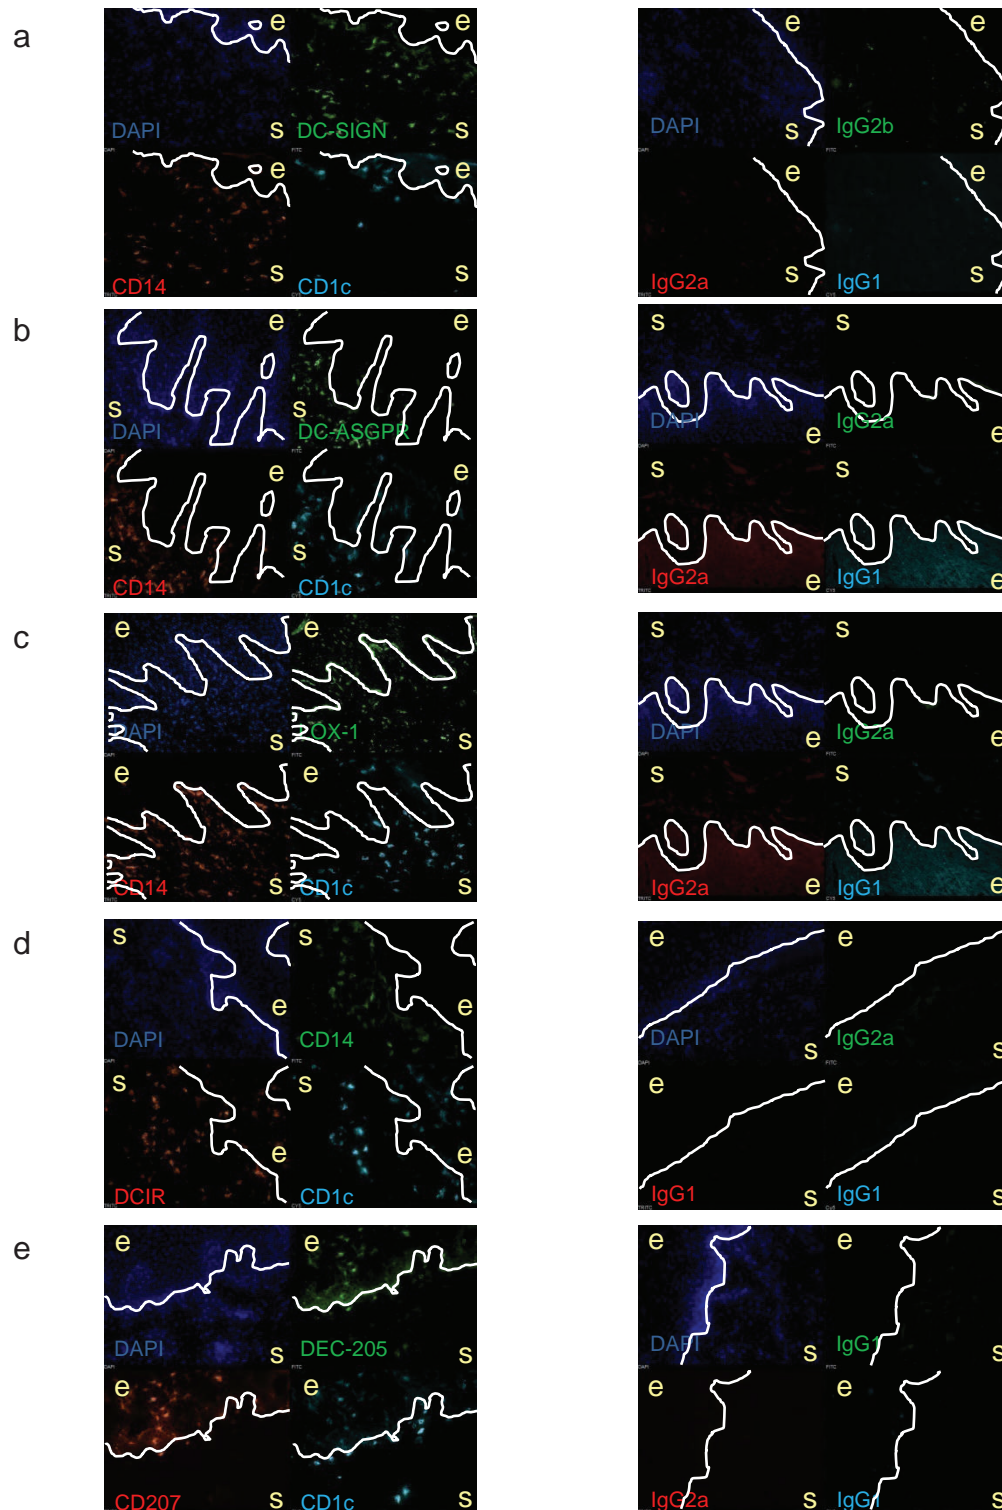

**Figure S18: Immunofluorescence staining of lectin receptors on human vagina.** a. Frozen tissue sections were stained for DC-SIGN, CD1c and CD14 (left panels) and isotype controls (right panels). b. DC-ASGPR, CD1c and CD14 (left panels) and isotype controls (right panels). c. LOX-1, CD1c and CD14 (left panels) and isotype controls (right panels). d. DCIR, CD1c and CD14 (left panels) and isotype controls (right panels). e. DEC-205, CD1c and CD14 (left panels) and isotype controls (right panels). (x20, bar is 100 mm). e: epithelium; s: submucosa
