# Supplementary material for: Transcriptional fingerprints of antigen-presenting cell subsets in the human vaginal mucosa and skin reflect tissue-specific immune microenvironments
Source: PubMed Central journal article supplement (PMC4268898; doi:10.1186/s13073-014-0098-y), 2014-11-25
Supplement: 13073_2014_98_MOESM19_ESM.pdf [file 13073_2014_98_MOESM19_ESM.pdf]

|              |          |                                                                  |                    |     |     |     |     |     |     |     |     |
|--------------|----------|------------------------------------------------------------------|--------------------|-----|-----|-----|-----|-----|-----|-----|-----|
| ILMN 1799030 | CMTM2    | Homo sapiens KLF-like MARVEL transmembrane domain cd             | Chemokine Receptor | -   | -   | -   | +   | +   | +   | +   | +   |
| ILMN 1679277 | CMTM3    | Homo sapiens KLF-like MARVEL transmembrane domain cd             | Chemokine Receptor | -   | -   | -   | +   | +   | +   | +   | -   |
| ILMN 1667840 | CMTM3    | Homo sapiens KLF-like MARVEL transmembrane domain cd             | Chemokine Receptor | +   | +   | +   | +   | +   | +   | +   | +   |
| ILMN 2370208 | CMTM3    | Homo sapiens KLF-like MARVEL transmembrane domain cd             | Chemokine Receptor | +   | +   | +   | +   | +   | +   | +   | +   |
| ILMN 1754442 | CMTM3    | Homo sapiens KLF-like MARVEL transmembrane domain cd             | Chemokine Receptor | +   | +   | +   | +   | +   | ++  | ++  | ++  |
| ILMN 1762718 | CMTM4    | Homo sapiens KLF-like MARVEL transmembrane domain cd             | Chemokine Receptor | +   | +   | +   | +   | +   | +   | +   | +   |
| ILMN 1815319 | CMTM4    | Homo sapiens KLF-like MARVEL transmembrane domain cd             | Chemokine Receptor | +   | +   | +   | +   | +   | +   | +   | +   |
| ILMN 1729514 | CMTM4    | Homo sapiens KLF-like MARVEL transmembrane domain cd             | Chemokine Receptor | ND  | ND  | ND  | ND  | ND  | ND  | ND  | ND  |
| ILMN 1720930 | CMTM4    | Homo sapiens KLF-like MARVEL transmembrane domain cd             | Chemokine Receptor | ND  | ND  | ND  | ND  | ND  | ND  | ND  | ND  |
| ILMN 1696494 | CMTM6    | Homo sapiens KLF-like MARVEL transmembrane domain cd             | Chemokine Receptor | +++ | ++  | ++  | ++  | ++  | ++  | ++  | +++ |
| ILMN 1740487 | CMTM7    | Homo sapiens KLF-like MARVEL transmembrane domain cd             | Chemokine Receptor | +   | -   | +   | +   | +   | +   | +   | -   |
| ILMN 2403247 | CMTM7    | Homo sapiens KLF-like MARVEL transmembrane domain cd             | Chemokine Receptor | +   | +   | +   | +   | +   | +   | +   | +   |
| ILMN 1698934 | CMTM7    | Homo sapiens KLF-like MARVEL transmembrane domain cd             | Chemokine Receptor | +++ | ++  | ++  | +++ | ++  | +++ | +++ | ++  |
| ILMN 1710124 | CMTM8    | Homo sapiens KLF-like MARVEL transmembrane domain cd             | Chemokine Receptor | +   | +   | -   | +   | +   | +   | +   | -   |
| ILMN 1745788 | CX3CR1   | Homo sapiens chemokine (C-X3-C motif) receptor 1 (CX3CR1)        | Chemokine Receptor | +   | +   | +   | +   | +   | +   | +   | +   |
| ILMN 2088437 | CX3CR1   | Homo sapiens chemokine (C-X3-C motif) receptor 1 (CX3CR1)        | Chemokine Receptor | +   | +   | +   | -   | +   | +   | +   | +   |
| ILMN 1662524 | CXCR1    | Homo sapiens chemokine (C-X-C motif) receptor 1 (CXCR1)          | Chemokine Receptor | -   | -   | -   | +   | +   | +   | +   | -   |
| ILMN 1797975 | CXCR3    | Homo sapiens chemokine (C-X-C motif) receptor 3 (CXCR3)          | Chemokine Receptor | +   | +   | +   | +   | +   | +   | +   | +   |
| ILMN 2246410 | CXCR4    | Homo sapiens chemokine (C-X-C motif) receptor 4 (CXCR4)          | Chemokine Receptor | +   | +   | +   | -   | +   | +   | +   | +   |
| ILMN 1801584 | CXCR4    | Homo sapiens chemokine (C-X-C motif) receptor 4 (CXCR4)          | Chemokine Receptor | +   | +   | +   | +   | +   | +   | +   | +   |
| ILMN 2320888 | CXCR4    | Homo sapiens chemokine (C-X-C motif) receptor 4 (CXCR4)          | Chemokine Receptor | +   | ++  | ++  | +   | +   | +   | +   | ++  |
| ILMN 2337931 | CXCR5    | Homo sapiens chemokine (C-X-C motif) receptor 5 (CXCR5)          | Chemokine Receptor | +   | +   | +   | +   | +   | +   | +   | +   |
| ILMN 2337928 | CXCR5    | Homo sapiens chemokine (C-X-C motif) receptor 5 (CXCR5)          | Chemokine Receptor | +   | +   | +   | +   | +   | +   | +   | +   |
| ILMN 1674640 | CXCR6    | Homo sapiens chemokine (C-X-C motif) receptor 6 (CXCR6)          | Chemokine Receptor | -   | -   | -   | +   | +   | +   | +   | -   |
| ILMN 2371458 | CXCR7    | Homo sapiens chemokine (C-X-C motif) receptor 7 (CXCR7)          | Chemokine Receptor | -   | +   | ++  | +   | +   | +   | +   | +   |
| ILMN 1798360 | CXCR7    | Homo sapiens chemokine (C-X-C motif) receptor 7 (CXCR7)          | Chemokine Receptor | +   | ++  | ++  | +   | +   | ++  | ++  | +   |
| ILMN 1680397 | IL8RB    | Homo sapiens interleukin 8 receptor, beta (IL8RB)                | Chemokine Receptor | +   | +   | +   | +   | +   | +   | +   | +   |
| ILMN 1747251 | LTBR4    | Homo sapiens leukotriene B4 receptor (LTBR4)                     | Chemokine Receptor | +   | +   | +   | +   | +   | +   | +   | +   |
| ILMN 1685005 | TNFRSF1A | Homo sapiens tumor necrosis factor receptor superfamily, mem     | Chemokine Receptor | ++  | ++  | ++  | ++  | ++  | ++  | ++  | ++  |
| ILMN 1688231 | TREM1    | Homo sapiens triggering receptor expressed on myeloid cells 1    | Chemokine Receptor | +   | ++  | ++  | +   | +   | ++  | ++  | +   |
| ILMN 1701248 | TREM2    | Homo sapiens triggering receptor expressed on myeloid cells 2    | Chemokine Receptor | +   | -   | +   | -   | -   | +   | +   | +   |
| ILMN 1764034 | XCR1     | Homo sapiens chemokine (C motif) receptor 1 (XCR1)               | Chemokine Receptor | +   | -   | +   | +   | +   | +   | +   | +   |
| ILMN 2407954 | XCR1     | Homo sapiens chemokine (C motif) receptor 1 (XCR1)               | Chemokine Receptor | ND  | ND  | ND  | ND  | ND  | ND  | ND  | ND  |
| ILMN 1773238 | XCR1     | Homo sapiens chemokine (C motif) receptor 1 (XCR1)               | Chemokine Receptor | ND  | ND  | ND  | ND  | ND  | ND  | ND  | ND  |
| ILMN 1779257 | CD40     | Homo sapiens CD40 molecule, TNF receptor superfamily mem         | Costimulation      | +   | +   | +   | +   | +   | +   | +   | +   |
| ILMN 2367818 | CD40     | Homo sapiens CD40 molecule, TNF receptor superfamily mem         | Costimulation      | +   | +   | +   | +   | +   | +   | +   | +   |
| ILMN 1716736 | CD80     | Homo sapiens CD80 molecule (CD80)                                | Costimulation      | +   | +   | +   | +   | +   | +   | +   | -   |
| ILMN 1782560 | CD86     | Homo sapiens CD86 antigen (CD28 antigen ligand 2, B7-2 ant       | Costimulation      | +   | +   | +   | +   | +   | +   | +   | +   |
| ILMN 1714602 | CD86     | Homo sapiens CD86 molecule (CD86)                                | Costimulation      | +++ | +++ | +++ | +++ | +++ | +++ | +++ | +++ |
| ILMN 1672097 | CD86     | Homo sapiens CD86 antigen (CD28 antigen ligand 2, B7-2 ant       | Costimulation      | ND  | ND  | ND  | ND  | ND  | ND  | ND  | ND  |
| ILMN 1675671 | ICOSLG   | Homo sapiens inducible T-cell co-stimulator ligand (ICOSLG)      | Costimulation      | +   | +   | +   | +   | +   | +   | +   | +   |
| ILMN 2089875 | TNFSF4   | Homo sapiens tumor necrosis factor (ligand) superfamily, mem     | Costimulation      | ++  | +   | +   | +   | +   | +   | +   | +   |
| ILMN 1746175 | TNFSF4   | Homo sapiens tumor necrosis factor (ligand) superfamily, mem     | Costimulation      | ++  | +   | +   | +   | +   | +   | +   | +   |
| ILMN 1751464 | TNFSF9   | Homo sapiens tumor necrosis factor (ligand) superfamily, mem     | Costimulation      | +   | +   | +   | +   | +   | +   | +   | +   |
| ILMN 1804421 | AREG     | Homo sapiens amphiregulin (AREG)                                 | Cytokine           | ND  | ND  | ND  | ND  | ND  | ND  | ND  | ND  |
| ILMN 1697694 | ATP6AP1  | Homo sapiens ATPase, H+ transporting, lysosomal accessory p      | Cytokine           | +++ | +++ | +++ | +++ | +++ | +++ | +++ | +++ |
| ILMN 1791688 | BMP10    | Homo sapiens bone morphogenetic protein 10 (BMP10)               | Cytokine           | ND  | ND  | ND  | ND  | ND  | ND  | ND  | ND  |
| ILMN 1702755 | BMP15    | Homo sapiens bone morphogenetic protein 15 (BMP15)               | Cytokine           | +   | -   | +   | +   | +   | +   | +   | -   |
| ILMN 1722718 | BMP2     | Homo sapiens bone morphogenetic protein 2 (BMP2)                 | Cytokine           | +   | +   | +   | +   | +   | +   | +   | +   |
| ILMN 1682661 | BMP3     | Homo sapiens bone morphogenetic protein 3 (BMP3)                 | Cytokine           | ND  | ND  | ND  | ND  | ND  | ND  | ND  | ND  |
| ILMN 1660552 | BMP5     | Homo sapiens bone morphogenetic protein 5 (BMP5)                 | Cytokine           | ND  | ND  | ND  | ND  | ND  | ND  | ND  | ND  |
| ILMN 1747650 | BMP6     | Homo sapiens bone morphogenetic protein 6 (BMP6)                 | Cytokine           | +   | ++  | ++  | +   | +   | +   | +   | -   |
| ILMN 1741566 | BMP7     | Homo sapiens bone morphogenetic protein 7 (osteogenic prote      | Cytokine           | +   | +   | +   | +   | +   | +   | +   | +   |
| ILMN 2123415 | BMP8B    | Homo sapiens bone morphogenetic protein 8b (BMP8B)               | Cytokine           | +   | -   | -   | +   | +   | +   | +   | +   |
| ILMN 1659077 | CD40LG   | Homo sapiens CD40 ligand (CD40LG)                                | Cytokine           | ND  | ND  | ND  | ND  | ND  | ND  | ND  | ND  |
| ILMN 1760247 | CD70     | Homo sapiens CD70 molecule (CD70)                                | Cytokine           | +   | +   | +   | +   | +   | +   | +   | +   |
| ILMN 2302947 | CSF1     | Homo sapiens colony stimulating factor 1 (macrophage) (CSF1)     | Cytokine           | ND  | ND  | ND  | ND  | ND  | ND  | ND  | ND  |
| ILMN 1805930 | CSF1     | Homo sapiens colony stimulating factor 1 (macrophage) (CSF1)     | Cytokine           | ND  | ND  | ND  | ND  | ND  | ND  | ND  | ND  |
| ILMN 1733402 | CSF1     | Homo sapiens colony stimulating factor 1 (macrophage) (CSF1)     | Cytokine           | ND  | ND  | ND  | ND  | ND  | ND  | ND  | ND  |
| ILMN 1661861 | CSF2     | Homo sapiens colony stimulating factor 2 (granulocyte-macrop     | Cytokine           | +   | +   | +   | +   | +   | +   | +   | +   |
| ILMN 2322768 | CSF3     | Homo sapiens colony stimulating factor 3 (granulocyte) (CSF3)    | Cytokine           | -   | -   | +   | +   | +   | +   | +   | -   |
| ILMN 1697069 | CSF3     | Homo sapiens colony stimulating factor 3 (granulocyte) (CSF3)    | Cytokine           | -   | -   | +   | +   | +   | +   | +   | -   |
| ILMN 1706852 | CSF3     | Homo sapiens colony stimulating factor 3 (granulocyte) (CSF3)    | Cytokine           | ND  | ND  | ND  | ND  | ND  | ND  | ND  | ND  |
| ILMN 1691276 | CXXC1    | Homo sapiens CXXC finger 1 (PHD domain) (CXXC1)                  | Cytokine           | +++ | +++ | +++ | +++ | +++ | +++ | +++ | ++  |
| ILMN 1685767 | FAM3B    | Homo sapiens family with sequence similarity 3, member B (F      | Cytokine           | -   | -   | -   | +   | +   | +   | +   | -   |
| ILMN 2355486 | FAM3B    | Homo sapiens family with sequence similarity 3, member B (F      | Cytokine           | -   | -   | -   | +   | +   | +   | +   | -   |
| ILMN 1777261 | FAM3C    | Homo sapiens family with sequence similarity 3, member C (F      | Cytokine           | +   | +   | +   | +   | +   | +   | +   | -   |
| ILMN 2368773 | FAM3C    | Homo sapiens family with sequence similarity 3, member C (F      | Cytokine           | +   | +   | +   | +   | +   | +   | +   | +   |
| ILMN 1781824 | FASLG    | Homo sapiens Fas ligand (TNF superfamily, member 6) (FASL        | Cytokine           | ND  | ND  | ND  | ND  | ND  | ND  | ND  | ND  |
| ILMN 2110110 | FGF10    | Homo sapiens fibroblast growth factor 10 (FGF10)                 | Cytokine           | ND  | ND  | ND  | ND  | ND  | ND  | ND  | ND  |
| ILMN 1707612 | FIGF     | Homo sapiens c-fos induced growth factor (vascular endothelia    | Cytokine           | +   | +   | +   | +   | +   | +   | +   | +   |
| ILMN 2091412 | FLT3LG   | Homo sapiens fms-related tyrosine kinase 3 ligand (FLT3LG)       | Cytokine           | -   | -   | -   | +   | +   | +   | +   | -   |
| ILMN 1678191 | GDF10    | Homo sapiens growth differentiation factor 10 (GDF10)            | Cytokine           | ND  | ND  | ND  | ND  | ND  | ND  | ND  | ND  |
| ILMN 1745132 | GDF11    | Homo sapiens growth differentiation factor 11 (GDF11)            | Cytokine           | +   | +   | +   | +   | +   | +   | +   | +   |
| ILMN 2188862 | GDF15    | Homo sapiens growth differentiation factor 15 (GDF15)            | Cytokine           | +   | +   | +   | +   | +   | +   | +   | +   |
| ILMN 1760363 | GDF2     | Homo sapiens growth differentiation factor 2 (GDF2)              | Cytokine           | ND  | ND  | ND  | ND  | ND  | ND  | ND  | ND  |
| ILMN 2210111 | GDF3     | Homo sapiens growth differentiation factor 3 (GDF3)              | Cytokine           | ND  | ND  | ND  | ND  | ND  | ND  | ND  | ND  |
| ILMN 1796471 | GDF5     | Homo sapiens growth differentiation factor 5 (GDF5)              | Cytokine           | ND  | ND  | ND  | ND  | ND  | ND  | ND  | ND  |
| ILMN 1738783 | GDF9     | Homo sapiens growth differentiation factor 9 (GDF9)              | Cytokine           | +   | +   | +   | +   | +   | +   | +   | +   |
| ILMN 1688663 | IFNA1    | Homo sapiens interferon, alpha 1 (IFNA1)                         | Cytokine           | ND  | ND  | ND  | ND  | ND  | ND  | ND  | ND  |
| ILMN 2193942 | IFNA13   | Homo sapiens interferon, alpha 13 (IFNA13)                       | Cytokine           | ND  | ND  | ND  | ND  | ND  | ND  | ND  | ND  |
| ILMN 1664595 | IFNA13   | Homo sapiens interferon, alpha 13 (IFNA13)                       | Cytokine           | ND  | ND  | ND  | ND  | ND  | ND  | ND  | ND  |
| ILMN 2129202 | IFNA14   | Homo sapiens interferon, alpha 14 (IFNA14)                       | Cytokine           | ND  | ND  | ND  | ND  | ND  | ND  | ND  | ND  |
| ILMN 1742328 | IFNA14   | Homo sapiens interferon, alpha 14 (IFNA14)                       | Cytokine           | ND  | ND  | ND  | ND  | ND  | ND  | ND  | ND  |
| ILMN 1698186 | IFNA2    | Homo sapiens interferon, alpha 2 (IFNA2)                         | Cytokine           | ND  | ND  | ND  | ND  | ND  | ND  | ND  | ND  |
| ILMN 1782448 | IFNA4    | Homo sapiens interferon, alpha 4 (IFNA4)                         | Cytokine           | +   | +   | +   | +   | +   | +   | +   | +   |
| ILMN 2202096 | IFNA4    | Homo sapiens interferon, alpha 4 (IFNA4)                         | Cytokine           | ND  | ND  | ND  | ND  | ND  | ND  | ND  | ND  |
| ILMN 1660195 | IFNA5    | Homo sapiens interferon, alpha 5 (IFNA5)                         | Cytokine           | ND  | ND  | ND  | ND  | ND  | ND  | ND  | ND  |
| ILMN 2110561 | IFNA8    | Homo sapiens interferon, alpha 8 (IFNA8)                         | Cytokine           | ND  | ND  | ND  | ND  | ND  | ND  | ND  | ND  |
| ILMN 1678574 | IFNA8    | Homo sapiens interferon, alpha 8 (IFNA8)                         | Cytokine           | ND  | ND  | ND  | ND  | ND  | ND  | ND  | ND  |
| ILMN 1682245 | IFNB1    | Homo sapiens interferon, beta 1, fibroblast (IFNB1)              | Cytokine           | ND  | ND  | ND  | ND  | ND  | ND  | ND  | ND  |
| ILMN 2207291 | IFNG     | Homo sapiens interferon, gamma (IFNG)                            | Cytokine           | +   | -   | -   | +   | +   | +   | +   | +   |
| ILMN 1676704 | IFNK     | Homo sapiens interferon, kappa (IFNK)                            | Cytokine           | ND  | ND  | ND  | ND  | ND  | ND  | ND  | ND  |
| ILMN 1781057 | IFNW1    | Homo sapiens interferon, omega 1 (IFNW1)                         | Cytokine           | +   | +   | +   | +   | +   | +   | +   | +   |
| ILMN 2176225 | IFNW1    | Homo sapiens interferon, omega 1 (IFNW1)                         | Cytokine           | ND  | ND  | ND  | ND  | ND  | ND  | ND  | ND  |
| ILMN 1699362 | IK       | Homo sapiens IK cytokine, down-regulator of HLA II (IK)          | Cytokine           | ++  | ++  | ++  | ++  | ++  | ++  | ++  | ++  |
| ILMN 1674167 | IL10     | Homo sapiens interleukin 10 (IL10)                               | Cytokine           | +   | +   | +   | +   | +   | +   | +   | +   |
| ILMN 2073307 | IL10     | Homo sapiens interleukin 10 (IL10)                               | Cytokine           | +++ | +++ | +++ | +++ | +++ | +++ | +++ | +++ |
| ILMN 1788107 | IL11     | Homo sapiens interleukin 11 (IL11)                               | Cytokine           | +   | +   | +   | +   | +   | +   | +   | +   |
| ILMN 1671353 | IL12A    | Homo sapiens interleukin 12A (natural killer cell stimulatory fa | Cytokine           | +   | +   | -   | -   | -   | -   | -   | +   |
| ILMN 1681132 | IL12B    | Homo sapiens interleukin 12B (natural killer cell stimulatory fa | Cytokine           | ND  | ND  | ND  | ND  | ND  | ND  | ND  | ND  |
| ILMN 2052511 | IL13     | Homo sapiens interleukin 13 (IL13)                               | Cytokine           | ND  | ND  | ND  | ND  | ND  | ND  | ND  | ND  |
| ILMN 1813572 | IL16     | Homo sapiens interleukin 16 (lymphocyte chemoattractant fact     | Cytokine           | -   | -   | -   | -   | -   | -   | -   | +   |
| ILMN 2290628 | IL16     | Homo sapiens interleukin 16 (lymphocyte chemoattractant fact     | Cytokine           | -   | -   | -   | -   | -   | -   | -   | +   |
| ILMN 1774983 | IL17A    | Homo sapiens interleukin 17A (IL17A)                             | Cytokine           | +   | -   | +   | +   | +   | +   | +   | -   |

|              |           |                                                                          |                      |     |     |     |     |     |     |     |     |     |
|--------------|-----------|--------------------------------------------------------------------------|----------------------|-----|-----|-----|-----|-----|-----|-----|-----|-----|
| ILMN 1766707 | IL17B     | Homo sapiens interleukin 17B (IL17B)                                     | Cytokine             | ND  | ND  | ND  | ND  | ND  | ND  | ND  | ND  | ND  |
| ILMN 1788109 | IL17C     | Homo sapiens interleukin 17C (IL17C)                                     | Cytokine             | ND  | ND  | ND  | ND  | ND  | ND  | ND  | ND  | ND  |
| ILMN 2188247 | IL17F     | Homo sapiens interleukin 17F (IL17F)                                     | Cytokine             | ND  | ND  | ND  | ND  | ND  | ND  | ND  | ND  | ND  |
| ILMN 1778457 | IL18      | Homo sapiens interleukin 18 (interferon-gamma-inducing factor)           | Cytokine             | +++ | +++ | +++ | +++ | +++ | +++ | +++ | +++ | +++ |
| ILMN 1799575 | IL19      | Homo sapiens interleukin 19 (IL19)                                       | Cytokine             | +   | +   | +   | -   | -   | +   | +   | +   | +   |
| ILMN 1682592 | IL19      | Homo sapiens interleukin 19 (IL19)                                       | Cytokine             | ND  | ND  | ND  | ND  | ND  | ND  | ND  | ND  | ND  |
| ILMN 1658483 | IL1A      | Homo sapiens interleukin 1, alpha (IL1A)                                 | Cytokine             | +   | ++  | ++  | +   | +   | +   | ++  | +   | +   |
| ILMN 1775501 | IL1B      | Homo sapiens interleukin 1, beta (IL1B)                                  | Cytokine             | ++  | +++ | +++ | ++  | ++  | +++ | +++ | +++ | +++ |
| ILMN 1804901 | IL1F5     | Homo sapiens interleukin 1 family, member 5 (delta) (IL1F5)              | Cytokine             | +   | +   | +   | +   | +   | +   | +   | +   | +   |
| ILMN 1759141 | IL1F5     | Homo sapiens interleukin 1 family, member 5 (delta) (IL1F5)              | Cytokine             | ND  | ND  | ND  | ND  | ND  | ND  | ND  | ND  | ND  |
| ILMN 1740400 | IL1F6     | Homo sapiens interleukin 1 family, member 6 (epsilon) (IL1F6)            | Cytokine             | ND  | ND  | ND  | ND  | ND  | ND  | ND  | ND  | ND  |
| ILMN 2158713 | IL1F9     | Homo sapiens interleukin 1 family, member 9 (IL1F9)                      | Cytokine             | +   | +   | +   | ++  | ++  | +   | ++  | +   | -   |
| ILMN 1704321 | IL2       | Homo sapiens interleukin 2 (IL2)                                         | Cytokine             | ND  | ND  | ND  | ND  | ND  | ND  | ND  | ND  | ND  |
| ILMN 1772674 | IL21      | Homo sapiens interleukin 21 (IL21)                                       | Cytokine             | ND  | ND  | ND  | ND  | ND  | ND  | ND  | ND  | ND  |
| ILMN 2100046 | IL22      | Homo sapiens interleukin 22 (IL22)                                       | Cytokine             | ND  | ND  | ND  | ND  | ND  | ND  | ND  | ND  | ND  |
| ILMN 1735208 | IL22      | Homo sapiens interleukin 22 (IL22)                                       | Cytokine             | ND  | ND  | ND  | ND  | ND  | ND  | ND  | ND  | ND  |
| ILMN 1715603 | IL23A     | Homo sapiens interleukin 23, alpha subunit p19 (IL23A)                   | Cytokine             | +   | +++ | ++  | +   | +   | +   | +   | +   | +   |
| ILMN 1725814 | IL24      | Homo sapiens interleukin 24 (IL24)                                       | Cytokine             | +   | +   | +   | +   | +   | +   | +   | +   | -   |
| ILMN 2407799 | IL24      | Homo sapiens interleukin 24 (IL24)                                       | Cytokine             | +   | ++  | +++ | +   | -   | +   | ++  | +   | +   |
| ILMN 1774685 | IL24      | Homo sapiens interleukin 24 (IL24)                                       | Cytokine             | +   | +++ | +++ | +   | -   | ++  | +++ | +   | +   |
| ILMN 2401883 | IL25      | Homo sapiens interleukin 25 (IL25)                                       | Cytokine             | -   | -   | -   | +   | +   | +   | +   | +   | -   |
| ILMN 1720243 | IL25      | Homo sapiens interleukin 25 (IL25)                                       | Cytokine             | +   | +   | +   | +   | +   | +   | +   | +   | +   |
| ILMN 2401884 | IL25      | Homo sapiens interleukin 25 (IL25)                                       | Cytokine             | ND  | ND  | ND  | ND  | ND  | ND  | ND  | ND  | ND  |
| ILMN 1753758 | IL26      | Homo sapiens interleukin 26 (IL26)                                       | Cytokine             | ND  | ND  | ND  | ND  | ND  | ND  | ND  | ND  | ND  |
| ILMN 1662302 | IL28A     | Homo sapiens interleukin 28A (interferon, lambda 2) (IL28A)              | Cytokine             | ND  | ND  | ND  | ND  | ND  | ND  | ND  | ND  | ND  |
| ILMN 1768900 | IL28B     | Homo sapiens interleukin 28B (interferon, lambda 3) (IL28B)              | Cytokine             | ND  | ND  | ND  | ND  | ND  | ND  | ND  | ND  | ND  |
| ILMN 1684570 | IL29      | Homo sapiens interleukin 29 (interferon, lambda 1) (IL29)                | Cytokine             | ND  | ND  | ND  | ND  | ND  | ND  | ND  | ND  | ND  |
| ILMN 2149624 | IL29      | Homo sapiens interleukin 29 (interferon, lambda 1) (IL29)                | Cytokine             | ND  | ND  | ND  | ND  | ND  | ND  | ND  | ND  | ND  |
| ILMN 1766320 | IL3       | Homo sapiens interleukin 3 (colony-stimulating factor, multiple)         | Cytokine             | ND  | ND  | ND  | ND  | ND  | ND  | ND  | ND  | ND  |
| ILMN 2201866 | IL31      | Homo sapiens interleukin 31 (IL31)                                       | Cytokine             | ND  | ND  | ND  | ND  | ND  | ND  | ND  | ND  | ND  |
| ILMN 2368530 | IL32      | Homo sapiens interleukin 32 (IL32)                                       | Cytokine             | +   | -   | -   | +   | +   | +   | +   | +   | -   |
| ILMN 1778010 | IL32      | Homo sapiens interleukin 32 (IL32)                                       | Cytokine             | +   | +   | +   | +   | +   | +   | +   | +   | +   |
| ILMN 1809099 | IL33      | Homo sapiens interleukin 33 (IL33)                                       | Cytokine             | ND  | ND  | ND  | ND  | ND  | ND  | ND  | ND  | ND  |
| ILMN 2052924 | IL33      | Homo sapiens interleukin 33 (IL33)                                       | Cytokine             | ND  | ND  | ND  | ND  | ND  | ND  | ND  | ND  | ND  |
| ILMN 1713686 | IL34      | Homo sapiens interleukin 34 (IL34)                                       | Cytokine             | ND  | ND  | ND  | ND  | ND  | ND  | ND  | ND  | ND  |
| ILMN 2389080 | IL4       | Homo sapiens interleukin 4 (IL4)                                         | Cytokine             | ND  | ND  | ND  | ND  | ND  | ND  | ND  | ND  | ND  |
| ILMN 1669174 | IL4       | Homo sapiens interleukin 4 (IL4)                                         | Cytokine             | ND  | ND  | ND  | ND  | ND  | ND  | ND  | ND  | ND  |
| ILMN 1709300 | IL5       | Homo sapiens interleukin 5 (colony-stimulating factor, eosinophil)       | Cytokine             | +   | +   | +   | +   | +   | +   | +   | +   | +   |
| ILMN 2207190 | IL5       | Homo sapiens interleukin 5 (colony-stimulating factor, eosinophil)       | Cytokine             | ND  | ND  | ND  | ND  | ND  | ND  | ND  | ND  | ND  |
| ILMN 1699651 | IL6       | Homo sapiens interleukin 6 (interferon, beta 2) (IL6)                    | Cytokine             | +   | +   | ++  | +   | +   | +   | +   | +   | +   |
| ILMN 2059744 | IL7       | Homo sapiens interleukin 7 (IL7)                                         | Cytokine             | ND  | ND  | ND  | ND  | ND  | ND  | ND  | ND  | ND  |
| ILMN 1705769 | IL7       | Homo sapiens interleukin 7 (IL7)                                         | Cytokine             | ND  | ND  | ND  | ND  | ND  | ND  | ND  | ND  | ND  |
| ILMN 1666733 | IL8       | Homo sapiens interleukin 8 (IL8)                                         | Cytokine             | +++ | +++ | +++ | +++ | +++ | +++ | +++ | +++ | +++ |
| ILMN 2184373 | IL8       | Homo sapiens interleukin 8 (IL8)                                         | Cytokine             | +++ | +++ | +++ | +++ | +++ | +++ | +++ | +++ | +++ |
| ILMN 2151676 | IL9       | Homo sapiens interleukin 9 (IL9)                                         | Cytokine             | +   | +   | +   | +   | +   | +   | +   | +   | +   |
| ILMN 1653704 | IL9       | Homo sapiens interleukin 9 (IL9)                                         | Cytokine             | ND  | ND  | ND  | ND  | ND  | ND  | ND  | ND  | ND  |
| ILMN 1756443 | INHHA     | Homo sapiens inhibin, alpha (INHHA)                                      | Cytokine             | ND  | ND  | ND  | ND  | ND  | ND  | ND  | ND  | ND  |
| ILMN 1719547 | INHBA     | Homo sapiens inhibin, beta A (INHBA)                                     | Cytokine             | ND  | ND  | ND  | ND  | ND  | ND  | ND  | ND  | ND  |
| ILMN 1685714 | INHBB     | Homo sapiens inhibin, beta B (activin AB beta polypeptide) (INHBB)       | Cytokine             | ND  | ND  | ND  | ND  | ND  | ND  | ND  | ND  | ND  |
| ILMN 1673232 | LASS1     | Homo sapiens LAG1 homolog, ceramide synthase 1 (LASS1)                   | Cytokine             | ND  | ND  | ND  | ND  | ND  | ND  | ND  | ND  | ND  |
| ILMN 1781256 | LEFTY2    | Homo sapiens left-right determination factor 2 (LEFTY2)                  | Cytokine             | +   | +   | +   | -   | -   | -   | +   | +   | +   |
| ILMN 1795464 | LTA       | Homo sapiens lymphotoxin alpha (TNF superfamily, member 1)               | Cytokine             | -   | +   | +   | +   | +   | +   | +   | +   | +   |
| ILMN 2376204 | LTB       | Homo sapiens lymphotoxin beta (TNF superfamily, member 3)                | Cytokine             | +   | +   | +   | +   | +   | +   | +   | +   | +   |
| ILMN 2376205 | LTB       | Homo sapiens lymphotoxin beta (TNF superfamily, member 3)                | Cytokine             | +   | -   | +   | ++  | ++  | ++  | ++  | ++  | ++  |
| ILMN 1780516 | MSTN      | Homo sapiens myostatin (MSTN)                                            | Cytokine             | ND  | ND  | ND  | ND  | ND  | ND  | ND  | ND  | ND  |
| ILMN 1712537 | NODAL     | Homo sapiens nodal homolog (mouse) (NODAL)                               | Cytokine             | ND  | ND  | ND  | ND  | ND  | ND  | ND  | ND  | ND  |
| ILMN 2342695 | PDGFA     | Homo sapiens platelet-derived growth factor alpha polypeptide            | Cytokine             | +   | +   | +   | +   | +   | +   | +   | +   | +   |
| ILMN 1782661 | PDGFA     | PREDICTED: Homo sapiens platelet-derived growth factor alpha polypeptide | Cytokine             | +   | +   | +   | +   | +   | +   | +   | +   | +   |
| ILMN 1685982 | PDGFA     | Homo sapiens platelet-derived growth factor alpha polypeptide            | Cytokine             | ND  | ND  | ND  | ND  | ND  | ND  | ND  | ND  | ND  |
| ILMN 1775822 | PDGFB     | Homo sapiens platelet-derived growth factor beta polypeptide (beta 1)    | Cytokine             | +   | +   | +   | +   | +   | +   | +   | +   | +   |
| ILMN 2394305 | PDGFB     | Homo sapiens platelet-derived growth factor beta polypeptide (beta 1)    | Cytokine             | +   | +   | +   | +   | +   | +   | +   | +   | +   |
| ILMN 1737695 | PDGFB     | Homo sapiens platelet-derived growth factor beta polypeptide (beta 1)    | Cytokine             | ND  | ND  | ND  | ND  | ND  | ND  | ND  | ND  | ND  |
| ILMN 1813753 | PTN       | Homo sapiens pleiotrophin (PTN)                                          | Cytokine             | ND  | ND  | ND  | ND  | ND  | ND  | ND  | ND  | ND  |
| ILMN 1755883 | RPS27A    | Homo sapiens ribosomal protein S27a (RPS27A)                             | Cytokine             | ++  | ++  | -   | +   | +   | +   | +   | +   | +   |
| ILMN 2048326 | RPS27A    | Homo sapiens ribosomal protein S27a (RPS27A)                             | Cytokine             | +++ | +++ | +++ | ++  | ++  | +++ | +++ | +++ | +++ |
| ILMN 1705080 | SLURP1    | Homo sapiens secreted LY6/PLAUR domain containing 1 (SLURP1)             | Cytokine             | +   | +   | +   | +   | +   | +   | +   | +   | +   |
| ILMN 2374449 | SPP1      | Homo sapiens secreted phosphoprotein 1 (SPP1)                            | Cytokine             | +   | +   | +   | +   | +   | +   | +   | +   | +   |
| ILMN 1651354 | SPP1      | Homo sapiens secreted phosphoprotein 1 (SPP1)                            | Cytokine             | +   | ++  | ++  | +   | +   | ++  | +++ | +   | +   |
| ILMN 2083946 | TGFA      | Homo sapiens transforming growth factor, alpha (TGFA)                    | Cytokine             | +   | +   | +   | +   | +   | +   | +   | +   | +   |
| ILMN 1805175 | TGFA      | Homo sapiens transforming growth factor, alpha (TGFA)                    | Cytokine             | +   | +   | +   | +   | +   | +   | +   | +   | +   |
| ILMN 2129668 | TGFB1     | Homo sapiens transforming growth factor, beta 1 (TGFB1)                  | Cytokine             | +   | -   | +   | +   | +   | +   | +   | +   | -   |
| ILMN 1812526 | TGFB2     | Homo sapiens transforming growth factor, beta 2 (TGFB2)                  | Cytokine             | ND  | ND  | ND  | ND  | ND  | ND  | ND  | ND  | ND  |
| ILMN 1687652 | TGFB3     | Homo sapiens transforming growth factor, beta 3 (TGFB3)                  | Cytokine             | +   | +   | -   | +   | +   | +   | -   | +   | +   |
| ILMN 1737943 | THPO      | Homo sapiens thrombopoietin (THPO)                                       | Cytokine             | ND  | ND  | ND  | ND  | ND  | ND  | ND  | ND  | ND  |
| ILMN 1728106 | TNF       | Homo sapiens tumor necrosis factor (TNF superfamily, member 1)           | Cytokine             | +   | ++  | ++  | ++  | +   | ++  | ++  | +   | +   |
| ILMN 1676663 | TNFRSF11B | Homo sapiens tumor necrosis factor receptor superfamily, member 11B      | Cytokine             | ND  | ND  | ND  | ND  | ND  | ND  | ND  | ND  | ND  |
| ILMN 1801307 | TNFSF10   | Homo sapiens tumor necrosis factor (ligand) superfamily, member 10       | Cytokine             | +   | +   | +   | +   | +   | +   | +   | ++  | +   |
| ILMN 1658713 | TNFSF11   | Homo sapiens tumor necrosis factor (ligand) superfamily, member 11       | Cytokine             | +   | +   | +   | +   | +   | +   | +   | +   | +   |
| ILMN 1673175 | TNFSF11   | Homo sapiens tumor necrosis factor (ligand) superfamily, member 11       | Cytokine             | +   | +   | +   | +   | +   | +   | -   | +   | +   |
| ILMN 1695900 | TNFSF11   | Homo sapiens tumor necrosis factor (ligand) superfamily, member 11       | Cytokine             | ND  | ND  | ND  | ND  | ND  | ND  | ND  | ND  | ND  |
| ILMN 2399190 | TNFSF13   | Homo sapiens tumor necrosis factor (ligand) superfamily, member 13       | Cytokine             | ND  | ND  | ND  | ND  | ND  | ND  | ND  | ND  | ND  |
| ILMN 1784264 | TNFSF13   | Homo sapiens tumor necrosis factor (ligand) superfamily, member 13       | Cytokine             | ND  | ND  | ND  | ND  | ND  | ND  | ND  | ND  | ND  |
| ILMN 1758418 | TNFSF13B  | Homo sapiens tumor necrosis factor (ligand) superfamily, member 13B      | Cytokine             | +   | +   | +   | +   | +   | +   | +   | +   | +   |
| ILMN 2066858 | TNFSF13B  | Homo sapiens tumor necrosis factor (ligand) superfamily, member 13B      | Cytokine             | +   | ++  | ++  | ++  | ++  | ++  | ++  | ++  | ++  |
| ILMN 1655414 | TNFSF14   | Homo sapiens tumor necrosis factor (ligand) superfamily, member 14       | Cytokine             | +   | +   | +   | +   | +   | +   | +   | +   | -   |
| ILMN 2363392 | TNFSF14   | Homo sapiens tumor necrosis factor (ligand) superfamily, member 14       | Cytokine             | ++  | ++  | ++  | ++  | ++  | ++  | ++  | ++  | ++  |
| ILMN 1661343 | TNFSF14   | Homo sapiens tumor necrosis factor (ligand) superfamily, member 14       | Cytokine             | ND  | ND  | ND  | ND  | ND  | ND  | ND  | ND  | ND  |
| ILMN 1759501 | TNFSF15   | Homo sapiens tumor necrosis factor (ligand) superfamily, member 15       | Cytokine             | +   | +   | +   | +   | +   | +   | +   | +   | +   |
| ILMN 2106380 | TNFSF15   | Homo sapiens tumor necrosis factor (ligand) superfamily, member 15       | Cytokine             | +   | ++  | ++  | +   | ++  | +   | +   | +   | +   |
| ILMN 1738335 | TNFSF18   | Homo sapiens tumor necrosis factor (ligand) superfamily, member 18       | Cytokine             | ND  | ND  | ND  | ND  | ND  | ND  | ND  | ND  | ND  |
| ILMN 2089875 | TNFSF4    | Homo sapiens tumor necrosis factor (ligand) superfamily, member 4        | Cytokine             | ++  | +   | +   | +   | +   | +   | +   | +   | +   |
| ILMN 1746175 | TNFSF4    | Homo sapiens tumor necrosis factor (ligand) superfamily, member 4        | Cytokine             | ++  | +   | +   | +   | +   | +   | +   | +   | +   |
| ILMN 1761778 | TNFSF8    | Homo sapiens tumor necrosis factor (ligand) superfamily, member 8        | Cytokine             | +   | +   | +   | +   | +   | +   | +   | +   | +   |
| ILMN 1751464 | TNFSF9    | Homo sapiens tumor necrosis factor (ligand) superfamily, member 9        | Cytokine             | +   | +   | +   | +   | +   | +   | +   | +   | +   |
| ILMN 1737084 | TXLNA     | Homo sapiens taxilin alpha (TXLNA)                                       | Cytokine             | +   | +   | +   | ++  | ++  | ++  | ++  | +   | +   |
| ILMN 1722855 | VEGFB     | Homo sapiens vascular endothelial growth factor B (VEGFB)                | Cytokine             | +   | +   | +   | +   | +   | +   | +   | +   | +   |
| ILMN 1726981 | VEGFB     | Homo sapiens vascular endothelial growth factor B (VEGFB)                | Cytokine             | ++  | ++  | ++  | ++  | ++  | ++  | ++  | ++  | ++  |
| ILMN 1801814 | VEGFB     | Homo sapiens vascular endothelial growth factor B (VEGFB)                | Cytokine             | ND  | ND  | ND  | ND  | ND  | ND  | ND  | ND  | ND  |
| ILMN 1772274 | VEGFB     | PREDICTED: Homo sapiens vascular endothelial growth factor B (VEGFB)     | Cytokine             | ND  | ND  | ND  | ND  | ND  | ND  | ND  | ND  | ND  |
| ILMN 1798475 | CSF2RB    | Homo sapiens colony stimulating factor 2 receptor, beta, low-affinity    | Interleukin Receptor | -   | -   | +   | +   | +   | +   | +   | +   | -   |
| ILMN 1662524 | CXCR1     | Homo sapiens chemokine (C-X-C motif) receptor 1 (CXCR1)                  | Interleukin Receptor | -   | -   | +   | +   | +   | +   | +   | +   | +   |
| ILMN 1652825 | IL10RA    | Homo sapiens interleukin 10 receptor, alpha (IL10RA)                     | Interleukin Receptor | ++  | ++  | ++  | ++  | ++  | ++  | ++  | ++  | ++  |
| ILMN 1767360 | IL10RB    | Homo sapiens interleukin 10 receptor, beta (IL10RB)                      | Interleukin Receptor | +   | +   | +   | +   | +   | +   | +   | +   | +   |
| ILMN 2230892 | IL10RB    | Homo sapiens interleukin 10 receptor, beta (IL10RB)                      | Interleukin Receptor | ++  | ++  | +++ | ++  | ++  | +++ | +++ | +++ | ++  |
